# Supplementary material
Source: PubMed Central journal article supplement (PMC3112035)
Supplement: supp_blood-2011-02-334425_Document1.pdf [file supp_blood-2011-02-334425_Document1.pdf]

**Table S1. Oligonucleotides used in this study**

| Name                        | Description                                                                                    | Sequence                                                       | Gene  |
|-----------------------------|------------------------------------------------------------------------------------------------|----------------------------------------------------------------|-------|
| XhoI-5'Hmga2                | Primer for generation of $\Delta Hmga2$                                                        | 5'-CCCCCTCGAGCAACCCTCTCCGCCTCCAACCTCT-3'                       | Hmga2 |
| Clal-3'Hmga2                | Primer for generation of $\Delta Hmga2$                                                        | 5'-CCCCATCGATAATGTCGGCGCCCCCTAATCCTC-3'                        | Hmga2 |
| $\Delta Hmga2$ Forward      | $\Delta Hmga2$ -specific ( <i>Hmga2</i> cDNA-specific) primer for genotyping of $\Delta Hmga2$ | 5'-GAGCCAACCTGTGAGCCCT-3'                                      | Hmga2 |
| $\Delta Hmga2$ Reverse      | $\Delta Hmga2$ -specific (PGK-PA-specific) primer for genotyping of $\Delta Hmga2$             | 5'-CCTTCCATTCAAATGTAGGTACTCTGTTC-3'                            | Pgk   |
| Cre 5'                      | Genotyping primer for Tie1-cre                                                                 | 5'-CCAATTTACTGACCGTACACC-3'                                    | Cre   |
| Cre 3'                      | Genotyping primer for Tie1-cre                                                                 | 5'-TTACGTATATCCTGGCAGCG-3'                                     | Cre   |
| Piga lox-13+8               | Genotyping primer for LoxPiga                                                                  | 5'-GGACCACCTCAGCATGGCCAA-3'                                    | Piga  |
| Piga lox600rev              | Genotyping primer for LoxPiga                                                                  | 5'-TATTTTCAGGATTCAGTGCTGC-3'                                   | Piga  |
| Bubble-linker 1             | For generation of bubble-linker                                                                | 5'-CTCTCCCTTCTCGAATCGTAACCGTTCGTACGAGAATCGCTGTCCTCTCCTTC -3'   | N/A   |
| Bubble-linker 2             | For generation of bubble-linker                                                                | 5'-CGGAAGGAGAGGACGCTGTCTGTGCGAAGGTAAGGAACGGACGAGAGAAGGGAGAG-3' | N/A   |
| Linker-specific primer 1    | For bubble linker-mediated first PCR (specific for bubble)                                     | 5'-CGAATCGTAACCGTTCGTACGAGAATCGC- 3'                           | N/A   |
| Transgene-specific primer 1 | For bubble linker-mediated first PCR (specific for PGK-PROM)                                   | 5'-AGACGTGCTACTTCCATTTGTCACGTCCTG-3'                           | Pgk   |
| Linker-specific primer 2    | For bubble linker-mediated nested PCR (specific for bubble)                                    | 5'-CCGTTTCGTACGAGAATCGCTGTCC-3'                                | N/A   |
| Transgene-specific primer 2 | For bubble linker-mediated nested PCR (specific for PGK-PROM)                                  | 5'-TGTAGCGCCAAGTGCCCAGC-3'                                     | Pgk   |
| Hmga2 qPCR F                | qRT-PCR forward primer                                                                         | 5'-AACCTGTGAGCCCTCTCCTAA-3'                                    | Hmga2 |
| Hmga2 qPCR R                | qRT-PCR reverse primer                                                                         | 5'-GCCGTTTTTCTCCAATGGTC-3'                                     | Hmga2 |
| Hprt1 qPCR F                | qRT-PCR forward primer                                                                         | 5'-GTTGGATACAGGCCAGACTTTGTT-3'                                 | Hprt1 |
| Hprt1 qPCR R                | qRT-PCR reverse primer                                                                         | 5'-GATTCAACTTGCGCTCATCTTAGCC-3'                                | Hprt1 |
| Jak2 qPCR F                 | qRT-PCR forward primer                                                                         | 5'-TTTTCCCTCCCCAGAAGAAG-3'                                     | Jak2  |
| Jak2 qPCR R                 | qRT-PCR reverse primer                                                                         | 5'-TGCCTCCATTTCTGTCATTG-3'                                     | Jak2  |
| Actb qPCR F                 | qRT-PCR forward primer                                                                         | 5'-GGGAAATCGTGCGTGACATCAAAG-3'                                 | Actb  |
| Actb qPCR R                 | qRT-PCR reverse primer                                                                         | 5'-TGTGTTGGCATAGAGGTCTTTAC-3'                                  | Actb  |

Information of the primers for generation of  $\Delta Hmga2$ , genotyping of mice, qRT-PCR, and bubble linker-mediated PCR, and oligonucleotides for making bubble-linker are shown.

**Table S2. Antibodies used in this study**

| <b>Antibody</b>              | <b>Experiment</b>                                    | <b>Clone</b> | <b>Vendor</b>             |
|------------------------------|------------------------------------------------------|--------------|---------------------------|
| Gr1 FITC (or biotin)         | Flow cytometry                                       | Ly6C/G       | BD Biosciences            |
| Ter119 PE                    | Flow cytometry                                       | Ly-76        | BD Biosciences            |
| TCR beta PE                  | Flow cytometry                                       | H57-597      | BD Biosciences            |
| CD45/B220 PE (or biotin)     | Flow cytometry                                       | RA3-6B2      | BD Biosciences            |
| CD115 PE*                    | Flow cytometry                                       | FMS, CSF-1R  | eBioscience               |
| CD45.1 PE (or biotin)        | Flow cytometry                                       | A20          | BD Biosciences            |
| CD45.2 FITC                  | Flow cytometry                                       | 104          | BD Biosciences            |
| CD24 FITC                    | Flow cytometry                                       | M1/69        | BD Biosciences            |
| FLAER                        | Flow cytometry                                       | FLAER†       | Pinewood Scientific       |
| Cy-chrome                    | Flow cytometry                                       | -            | BD Biosciences            |
| CD3                          | Flow cytometric progenitor analysis and cell sorting | 145-2C11     | eBioscience               |
| CD4                          | Flow cytometric progenitor analysis and cell sorting | L3T4         | eBioscience               |
| CD5                          | Flow cytometric progenitor analysis and cell sorting | 53.7.3       | eBioscience               |
| CD8                          | Flow cytometric progenitor analysis and cell sorting | 53.6.7       | eBioscience               |
| B220                         | Flow cytometric progenitor analysis and cell sorting | RA3-6B2      | eBioscience               |
| Gr1                          | Flow cytometric progenitor analysis and cell sorting | RB6-8C5      | eBioscience               |
| Ter119                       | Flow cytometric progenitor analysis and cell sorting | Ly-76        | eBioscience               |
| CD11b                        | Flow cytometric progenitor analysis and cell sorting | m170         | eBioscience               |
| CD127                        | Flow cytometric progenitor analysis and cell sorting | A7R34        | eBioscience               |
| PE-Cy7                       | Flow cytometric progenitor analysis and cell sorting |              | eBioscience               |
| CD34 PE                      | Flow cytometric progenitor analysis and cell sorting | RAM34        | eBioscience               |
| CD16/32 APC                  | Flow cytometric progenitor analysis and cell sorting | 93           | eBioscience               |
| Ly-6A/E (Sca-1) Pacific Blue | Flow cytometric progenitor analysis and cell sorting | D7           | iCyt Biolegend            |
| CD117 APC-Cy7                | Flow cytometric progenitor analysis and cell sorting | c-kit, 2B8   | eBioscience               |
| CD117 PE                     | Phosflow analysis                                    | c-kit        | BD Biosciences            |
| Ly-6A/E (Sca-1) PE-Cy5       | Phosflow analysis                                    | D7           | eBioscience               |
| pStat3 Alexa Fluor488        | Phosflow analysis                                    | pY705        | BD Biosciences            |
| PStat5 Alexa Fluor488        | Phosflow analysis                                    | pY694        | BD Biosciences            |
| HMGA2                        | Western blot                                         | -            | OXIS                      |
| Rabbit                       | Western blot                                         | IRDye 680    | LI-COR                    |
| β-actin                      | Western blot                                         | -            | Abcam                     |
| JAK2                         | Western blot                                         | D2E12        | Cell Signaling Technology |
| Phospho-Stat3 (Tyr705)       | Western blot                                         | D3A7         | Cell Signaling Technology |
| Stat3                        | Western blot                                         | -            | Cell Signaling Technology |
| Phospho-Stat5 (Tyr694)       | Western blot                                         | -            | Cell Signaling Technology |
| Stat5                        | Western blot                                         | -            | Cell Signaling Technology |
| Phospho-Akt (Ser473)         | Western blot                                         | D9E          | Cell Signaling Technology |
| Akt                          | Western blot                                         | -            | Cell Signaling Technology |

\* CD115 PE was used for the detection of monocytes. † FLAER is fluorescently labeled aerolysin. BD Biosciences, San Jose, CA; eBiosciences, San Diego, CA; Pinewood Scientific, Victoria, Canada; iCyt Biolegend, Champaign, IL; OXIS, Foster City, CA; LI-COR, Lincoln, NE; Abcam, Cambridge, MA; Cell Signaling Technology, Danvers, MA.

**Table S3. The list of all differentially expressed (> 2-fold, p<0.01) genes in KLS cells**

| Public ID    | Gene Symbol    | P value    | Fold-Change |
|--------------|----------------|------------|-------------|
| NM_007499    | Atm            | 0.00003563 | 13.3646     |
| NM_001001492 | Lca5l          | 0.00752162 | 9.5695      |
| NM_007977    | F8             | 0.00868892 | 8.77421     |
| NM_001003910 | BC030307       | 0.00060952 | 7.99593     |
| NM_015805    | Atp9b          | 0.00112216 | 7.32754     |
| NM_178076    | Mcf2l          | 0.00715462 | 7.27836     |
| NM_001099634 | Myof           | 0.00777988 | 7.23849     |
| NM_026347    | lah1           | 0.00824754 | 7.16775     |
| NM_007868    | Dmd            | 0.00208188 | 7.15168     |
| NM_031997    | Tmem2          | 0.00203775 | 7.06163     |
| NM_010435    | Hira           | 0.00106620 | 7.04548     |
| NM_177561    | Usp46          | 0.00288632 | 6.80447     |
| NM_029525    | Prex2          | 0.00370425 | 6.70425     |
| NM_001025371 | RP23-433P19.11 | 0.00326279 | 6.60182     |
| NM_011256    | Pitpnm2        | 0.00677989 | 6.52638     |
| NM_013829    | Plcb4          | 0.00336265 | 6.40778     |
| NM_145396    | Tbl3           | 0.00443288 | 6.37874     |
| BC003944     | Vps16          | 0.00944217 | 6.26051     |
| NM_011875    | Psmd13         | 0.00851120 | 6.19794     |
| NM_016691    | Clcn5          | 0.00275415 | 6.19608     |
| NM_178382    | Flrt3          | 0.00348537 | 6.02808     |
| NM_177140    | D230037D09Rik  | 0.00660372 | 5.95927     |
| NM_029977    | Polq           | 0.00199382 | 5.93618     |
| NM_177208    | Dopey1         | 0.00610467 | 5.77917     |
| NM_026422    | Mrrf           | 0.00632111 | 5.75587     |
| NM_133867    | Eps8l3         | 0.00147078 | 5.692       |
| NM_001122829 | Upf1           | 0.00498045 | 5.67556     |
| NM_019864    | Atr            | 0.00349744 | 5.61269     |
| BC058107     | 2410089E03Rik  | 0.00261544 | 5.60838     |
| NM_027807    | Cul5           | 0.00393293 | 5.48184     |
| XR_034062    | LOC100047913   | 0.00352947 | 5.31413     |
| NM_009029    | Rb1            | 0.00153565 | 5.22218     |
| NM_031384    | Tex11          | 0.00261214 | 5.18325     |
| NM_153533    | Tenc1          | 0.00342979 | 5.12191     |
| NM_199195    | Bckdhb         | 0.00456365 | 5.09388     |
| NM_172120    | Vps41          | 0.00295652 | 5.0856      |
| NM_013864    | Ndrq2          | 0.00419192 | 5.06076     |
| NM_008713    | Nos3           | 0.00011900 | 4.98135     |
| NM_010324    | Got1           | 0.00094005 | 4.97253     |
| NM_013600    | Msh5           | 0.00413176 | 4.96541     |
| BC052447     | 4930402H24Rik  | 0.00273123 | 4.96103     |
| NM_175337    | Mlh3           | 0.00000927 | 4.9607      |
| NM_012054    | Aoah           | 0.00429461 | 4.95659     |
| NM_007979    | F9             | 0.00708885 | 4.93935     |
| NM_133756    | Gpn1           | 0.00061768 | 4.90572     |
| NM_025662    | Pigk           | 0.00346968 | 4.90475     |

|                    |               |            |         |
|--------------------|---------------|------------|---------|
| NM_008125          | Gjb2          | 0.00669879 | 4.89847 |
| NM_010259          | Gbp1          | 0.00897167 | 4.87401 |
| NM_028838          | Lrrc2         | 0.00610916 | 4.86618 |
| NM_001033229       | Cyp11b1       | 0.00562942 | 4.86421 |
| NM_007601          | Capn3         | 0.00557102 | 4.85618 |
| NM_001081176       | Polr3g        | 0.00050662 | 4.81861 |
| NM_026934          | Zc3h15        | 0.00385787 | 4.66823 |
| NM_015828          | Gne           | 0.00421603 | 4.65564 |
| NM_023879          | Rpgrip1       | 0.00416244 | 4.63987 |
| ENSMUST00000094250 | Lsm14b        | 0.00505906 | 4.61632 |
| NM_001081549       | Rcan1         | 0.00125721 | 4.60722 |
| NM_175324          | Acad11        | 0.00378013 | 4.60418 |
| NM_011211          | Ptprd         | 0.00611519 | 4.60349 |
| NM_134044          | AI413782      | 0.00053313 | 4.59364 |
| NM_026327          | 1810048J11Rik | 0.00090703 | 4.57411 |
| NM_021297          | Tlr4          | 0.00989623 | 4.53623 |
| NM_178726          | Ppm1l         | 0.00114993 | 4.51636 |
| NM_024459          | Ppp3r1        | 0.00456144 | 4.45982 |
| AK016739           | 4933408J17Rik | 0.00059133 | 4.44792 |
| NM_021408          | Ush2a         | 0.00545743 | 4.41137 |
| NM_021458          | Fzd3          | 0.00918144 | 4.37398 |
| NM_001142322       | Myo9b         | 0.00303981 | 4.3593  |
| ENSMUST00000019464 | Noxo1         | 0.00761250 | 4.35248 |
| NM_008689          | Nfkb1         | 0.00958683 | 4.30385 |
| BC112416           | D330045A20Rik | 0.00068300 | 4.26718 |
| NM_172456          | Exog          | 0.00598745 | 4.25404 |
| NM_030695          | Lrba          | 0.00471633 | 4.24426 |
| NM_139292          | Reep6         | 0.00848142 | 4.1992  |
| NM_001005608       | Itgb4         | 0.00293711 | 4.18829 |
| AK005822           | Gm10345       | 0.00828638 | 4.18496 |
| GQ225581           | 1700067C01Rik | 0.00991203 | 4.14216 |
| NM_007858          | Diap1         | 0.00909360 | 4.12679 |
| NM_001001979       | Megf10        | 0.00256711 | 4.09051 |
| NM_009885          | Cel           | 0.00709565 | 4.07229 |
| BC157950           | Kalrn         | 0.00559603 | 4.07066 |
| BC075697           | Ktn1          | 0.00933002 | 4.06388 |
| NM_001136072       | Meis2         | 0.00890624 | 4.05611 |
| NM_027164          | Lrrc27        | 0.00471366 | 4.00615 |
| NM_025696          | Sorcs3        | 0.00051676 | 3.97493 |
| NM_001024910       | Sept10        | 0.00943819 | 3.97281 |
| NM_146010          | Tspan8        | 0.00160817 | 3.97264 |
| NM_001024624       | Cdkl5         | 0.00016210 | 3.96279 |
| NM_207225          | Hdac4         | 0.00275963 | 3.93085 |
| ENSMUST00000088072 | Tsga10        | 0.00539434 | 3.90957 |
| NM_009376          | Ift88         | 0.00876082 | 3.90723 |
| NM_029017          | Mrpl47        | 0.00199347 | 3.85687 |
| NM_153399          | Syne1         | 0.00134553 | 3.84109 |
| NM_026222          | Ccdc39        | 0.00852783 | 3.84017 |
| NM_028783          | Robo4         | 0.00091610 | 3.82462 |

|                    |               |            |         |
|--------------------|---------------|------------|---------|
| ENSMUST00000113925 | Zfx           | 0.00642963 | 3.82185 |
| BC001985           | Ap4s1         | 0.00820580 | 3.81753 |
| NM_001033455       | Ccdc27        | 0.00071379 | 3.74107 |
| NM_001042715       | Ccdc135       | 0.00479654 | 3.73665 |
| NM_031177          | Ift122        | 0.00604481 | 3.7307  |
| BC112403           | 2310046O06Rik | 0.00168877 | 3.68662 |
| NM_011131          | Pold1         | 0.00944096 | 3.68208 |
| NM_146190          | Tubgcp5       | 0.00499443 | 3.62321 |
| NM_172658          | Slco4c1       | 0.00713896 | 3.61608 |
| NM_001001792       | Zfp239        | 0.00887794 | 3.6134  |
| NM_001025192       | Cxadr         | 0.00516421 | 3.61035 |
| BC132172           | C330023M02Rik | 0.00854334 | 3.60672 |
| NM_153391          | Wdr19         | 0.00057933 | 3.60017 |
| NM_001048176       | Cerkl         | 0.00681583 | 3.59403 |
| NM_007993          | Fbn1          | 0.00321358 | 3.57587 |
| NM_172992          | Phtf2         | 0.00398856 | 3.56983 |
| NM_153744          | Prkag3        | 0.00870135 | 3.56762 |
| NM_011921          | Aldh1a7       | 0.00615802 | 3.56623 |
| ENSMUST00000033665 | Map3k15       | 0.00623928 | 3.55921 |
| NM_028003          | Rpap3         | 0.00883096 | 3.54414 |
| NM_011539          | Tbxas1        | 0.00877585 | 3.53522 |
| BC027356           | Kars          | 0.00267283 | 3.53211 |
| NM_001033382       | Cacna2d4      | 0.00473084 | 3.51989 |
| NM_197992          | Pcgf1         | 0.00403810 | 3.48392 |
| NR_027819          | 1810032O08Rik | 0.00649281 | 3.48089 |
| NM_007732          | Col17a1       | 0.00886850 | 3.46951 |
| NM_029394          | Snx24         | 0.00902353 | 3.46945 |
| NM_172674          | Phf20         | 0.00108305 | 3.46572 |
| ENSMUST00000050610 | Kif2a         | 0.00030036 | 3.46358 |
| NM_172867          | Zfp462        | 0.00022335 | 3.45831 |
| NM_133365          | Dnahc5        | 0.00371747 | 3.43371 |
| NM_145573          | Mrps35        | 0.00220953 | 3.42939 |
| NM_145952          | Tbc1d12       | 0.00684130 | 3.40396 |
| ENSMUST00000115077 | Abcb8         | 0.00954838 | 3.3997  |
| NM_153587          | Rps6ka5       | 0.00947816 | 3.38833 |
| NM_198019          | Cep78         | 0.00627223 | 3.38625 |
| NM_001081161       | Fam171a1      | 0.00250291 | 3.37958 |
| NM_029347          | Fggy          | 0.00491930 | 3.37039 |
| NM_008413          | Jak2          | 0.00505137 | 3.3568  |
| NM_001127363       | Inpp5a        | 0.00299607 | 3.33522 |
| NM_001122738       | 1110028C15Rik | 0.00458924 | 3.32515 |
| NM_020329          | Dolpp1        | 0.00342718 | 3.32165 |
| NM_001114637       | Jmjd7         | 0.00329546 | 3.30132 |
| NM_001162965       | Sgsm1         | 0.00127923 | 3.29732 |
| NM_016768          | Pbx3          | 0.00689733 | 3.29403 |
| ENSMUST00000050139 | Ccrl1         | 0.00865088 | 3.28259 |
| NM_207205          | Igsf3         | 0.00869858 | 3.27852 |
| NM_175158          | Utp20         | 0.00461483 | 3.27816 |
| NM_027547          | Prdm5         | 0.00451515 | 3.26009 |

|                    |               |            |         |
|--------------------|---------------|------------|---------|
| NM_023042          | Recql         | 0.00794369 | 3.21834 |
| NM_144931          | Nae1          | 0.00742828 | 3.21538 |
| NM_015785          | Zpbp          | 0.00254358 | 3.21074 |
| NM_007462          | Apc           | 0.00215115 | 3.20934 |
| NM_001081417       | Chd7          | 0.00976187 | 3.20665 |
| NM_027764          | Rcbtb1        | 0.00717900 | 3.20232 |
| NM_008484          | Lamb3         | 0.00280145 | 3.18161 |
| NM_145511          | BC003331      | 0.00072989 | 3.17585 |
| ENSMUST00000053096 | Smg6          | 0.00238245 | 3.17206 |
| NM_001013767       | Capn11        | 0.00640280 | 3.16958 |
| NM_172781          | Klh4          | 0.00432423 | 3.15672 |
| XR_032234          | LOC675534     | 0.00379327 | 3.14372 |
| NM_001081295       | 4631416L12Rik | 0.00282078 | 3.14088 |
| NM_133981          | Alg9          | 0.00008324 | 3.12289 |
| NM_146122          | Dennd1a       | 0.00976604 | 3.11786 |
| NM_009367          | Tgfb2         | 0.00336539 | 3.10654 |
| NM_001081252       | Uggt2         | 0.00868890 | 3.10401 |
| NM_194257          | Fam118b       | 0.00892157 | 3.10163 |
| NM_007834          | Dscr3         | 0.00580425 | 3.0996  |
| NM_001114312       | 4930506M07Rik | 0.00817274 | 3.08009 |
| NM_009641          | Angpt4        | 0.00121616 | 3.06543 |
| NM_172436          | Slc25a12      | 0.00211373 | 3.04806 |
| NM_020603          | Wdr46         | 0.00458391 | 3.0426  |
| NM_172743          | Plekha7       | 0.00313924 | 3.04002 |
| NM_001039546       | Myo6          | 0.00932409 | 3.03261 |
| BC026495           | Fam161a       | 0.00246914 | 3.02448 |
| ENSMUST00000086485 | Atp2b4        | 0.00708361 | 3.01568 |
| ENSMUST00000057389 | Fam179b       | 0.00260444 | 3.01185 |
| NM_018877          | Setdb1        | 0.00502158 | 3.00764 |
| NM_173440          | Nrip1         | 0.00728694 | 3.00711 |
| NM_054053          | Gpr98         | 0.00529688 | 2.99796 |
| NM_001045522       | BC030499      | 0.00026459 | 2.99563 |
| NM_026238          | Narfl         | 0.00192283 | 2.97606 |
| BC057872           | Rab3gap2      | 0.00119020 | 2.97173 |
| ENSMUST00000080483 | Olf119        | 0.00827856 | 2.95674 |
| NM_001013806       | Ankrd13c      | 0.00217231 | 2.95356 |
| NM_001079875       | Spam1         | 0.00810761 | 2.9495  |
| NM_027890          | Susd2         | 0.00977046 | 2.93636 |
| NM_025660          | Ribc1         | 0.00367847 | 2.93546 |
| NM_025473          | Fam3a         | 0.00701521 | 2.93304 |
| NM_026453          | Mak16         | 0.00148214 | 2.92863 |
| NM_001014398       | Trcg1         | 0.00095985 | 2.92393 |
| NM_177045          | Cc2d1b        | 0.00959952 | 2.91551 |
| NM_021557          | Rdh11         | 0.00338788 | 2.91179 |
| BC116270           | Mtmr15        | 0.00318476 | 2.9019  |
| NM_172803          | Dock4         | 0.00435821 | 2.89745 |
| BC021773           | Glb1l         | 0.00568016 | 2.89584 |
| NM_028817          | Acsl3         | 0.00665362 | 2.87759 |
| NM_009702          | Aqr           | 0.00474888 | 2.87638 |

|                    |               |            |         |
|--------------------|---------------|------------|---------|
| NM_028228          | 2610028A01Rik | 0.00249388 | 2.86243 |
| NM_029444          | Six6os1       | 0.00705739 | 2.85188 |
| NM_009686          | Apbb2         | 0.00236443 | 2.84805 |
| NM_145572          | Gys2          | 0.00768475 | 2.84572 |
| ENSMUST00000040739 | Piwil4        | 0.00348976 | 2.84084 |
| NM_172462          | Zfp11         | 0.00316482 | 2.82288 |
| NM_008760          | Ogn           | 0.00584207 | 2.81879 |
| NM_010207          | Fgfr2         | 0.00487875 | 2.8082  |
| NM_001033364       | Pcdh24        | 0.00869341 | 2.80428 |
| NM_016866          | Stk39         | 0.00956790 | 2.80146 |
| NM_030215          | Wrnip1        | 0.00701316 | 2.79168 |
| NM_009808          | Casp12        | 0.00734692 | 2.79033 |
| NM_025711          | Aspn          | 0.00771972 | 2.78792 |
| NM_001001882       | Rtel1         | 0.00948282 | 2.78605 |
| NM_008396          | Itga2         | 0.00409187 | 2.78518 |
| NM_181325          | Slc25a15      | 0.00797901 | 2.77881 |
| NM_001034899       | Gm16432       | 0.00456798 | 2.778   |
| NM_023256          | Krt20         | 0.00329452 | 2.76115 |
| NM_183182          | BC055111      | 0.00191957 | 2.7606  |
| NM_178710          | Sik2          | 0.00803754 | 2.75518 |
| NM_013790          | Abcc5         | 0.00049782 | 2.75347 |
| NM_008384          | Inpp1         | 0.00668933 | 2.7431  |
| NM_029835          | 5730590G19Rik | 0.00670611 | 2.73602 |
| NM_008478          | L1cam         | 0.00061592 | 2.73494 |
| NM_008032          | Aff2          | 0.00210099 | 2.72454 |
| NM_001081302       | Trio          | 0.00059549 | 2.71474 |
| NM_011431          | Eftud2        | 0.00784328 | 2.71077 |
| NM_016847          | Avpr1a        | 0.00895508 | 2.70763 |
| NM_145210          | Oas1e         | 0.00479476 | 2.69887 |
| NM_001039376       | Pde4dip       | 0.00800661 | 2.67987 |
| BC119816           | Zmynd17       | 0.00072140 | 2.67837 |
| NM_007688          | Cfl2          | 0.00510234 | 2.67185 |
| NM_001110204       | Acvr1         | 0.00435205 | 2.66553 |
| NM_133967          | Zdhhc7        | 0.00938457 | 2.66326 |
| NM_138953          | Eil2          | 0.00679476 | 2.6604  |
| NM_024228          | Gdpd3         | 0.00516205 | 2.6502  |
| NM_027475          | Ecd           | 0.00894341 | 2.64176 |
| NM_172050          | Cd300e        | 0.00356115 | 2.63589 |
| NM_001083897       | Mpzl1         | 0.00996036 | 2.63455 |
| NM_178909          | Wdr92         | 0.00435814 | 2.6279  |
| NM_001081153       | Unc13c        | 0.00873569 | 2.62718 |
| ENSMUST00000052570 | Arid3b        | 0.00184012 | 2.62289 |
| NM_008480          | Lama1         | 0.00219901 | 2.61552 |
| NM_029620          | Pcolce2       | 0.00051101 | 2.61451 |
| NM_024437          | Nudt7         | 0.00930859 | 2.61192 |
| NM_010019          | Dapk2         | 0.00686850 | 2.60635 |
| AK016179           | 4930558K02Rik | 0.00773180 | 2.60522 |
| BC048939           | A130022J15Rik | 0.00441001 | 2.5979  |
| NM_008635          | Mtap7         | 0.00705064 | 2.5898  |

|                    |               |            |         |
|--------------------|---------------|------------|---------|
| NM_182805          | Gpt           | 0.00582467 | 2.58627 |
| NM_011030          | P4ha1         | 0.00134429 | 2.56466 |
| NM_001161355       | Timd2         | 0.00798292 | 2.55837 |
| NM_148946          | Slc8a2        | 0.00957826 | 2.5553  |
| NM_001005424       | Gm996         | 0.00327400 | 2.55491 |
| NM_175283          | Srd5a1        | 0.00148647 | 2.55189 |
| NM_019955          | Ripk3         | 0.00292851 | 2.55042 |
| NM_173180          | Pmpca         | 0.00154725 | 2.54542 |
| NM_001113331       | Shc1          | 0.00313789 | 2.53684 |
| NM_001033779       | Gm5544        | 0.00885479 | 2.52995 |
| NM_028398          | Agxt2l2       | 0.00901282 | 2.52348 |
| ENSMUST00000079469 | Gm600         | 0.00876539 | 2.5214  |
| ENSMUST00000107933 | 1700008O03Rik | 0.00186023 | 2.51629 |
| NM_019651          | Ptpn9         | 0.00205752 | 2.50523 |
| NM_018889          | Pigb          | 0.00712383 | 2.50091 |
| NM_029851          | Dync2h1       | 0.00292134 | 2.49966 |
| ENSMUST00000074390 | Hmcn2         | 0.00419268 | 2.49377 |
| NM_009970          | Csf2ra        | 0.00055595 | 2.49249 |
| NM_199467          | F730047E07Rik | 0.00688226 | 2.48526 |
| NM_011857          | Odz3          | 0.00284543 | 2.48045 |
| NM_027089          | 4930579C15Rik | 0.00460774 | 2.47588 |
| NR_027957          | Ppp4r1l       | 0.00714149 | 2.44563 |
| NM_029801          | 1700021C14Rik | 0.00533516 | 2.44044 |
| NM_001039209       | Gm13152       | 0.00417742 | 2.43759 |
| NM_011159          | Prkdc         | 0.00785475 | 2.43289 |
| NM_012011          | Eif2s3y       | 0.00437974 | 2.42249 |
| NM_172473          | Hace1         | 0.00799103 | 2.41074 |
| NM_018883          | Camkk1        | 0.00065300 | 2.40855 |
| NM_007409          | Adh1          | 0.00460863 | 2.40138 |
| M19662             | Mdk           | 0.00252215 | 2.3978  |
| BC100361           | Larp2         | 0.00445630 | 2.39587 |
| NM_172748          | Fbxl19        | 0.00100882 | 2.3956  |
| NM_011800          | Cdh20         | 0.00103799 | 2.39165 |
| NM_001110013       | Tmtc3         | 0.00929950 | 2.39135 |
| NM_177290          | Itgb8         | 0.00500903 | 2.3885  |
| NM_153591          | Nars2         | 0.00135922 | 2.38849 |
| NM_011120          | Prl7d1        | 0.00381554 | 2.38415 |
| NM_008300          | Hspa4         | 0.00367626 | 2.37422 |
| NM_153402          | Eif2c3        | 0.00709481 | 2.36241 |
| NM_009592          | Abcb7         | 0.00970908 | 2.36234 |
| NM_008406          | Itih1         | 0.00596700 | 2.35163 |
| NM_001146046       | Lrrc49        | 0.00432028 | 2.34349 |
| NM_001081680       | Zfp72         | 0.00796779 | 2.34175 |
| NM_176972          | Usp37         | 0.00059342 | 2.34121 |
| NM_008031          | Fmr1          | 0.00273001 | 2.3401  |
| NM_001024626       | Zfp873        | 0.00739877 | 2.33836 |
| ENSMUST00000029548 | Nup210l       | 0.00925103 | 2.33628 |
| NM_007937          | Epha5         | 0.00501636 | 2.33402 |
| NM_181348          | Prune2        | 0.00862403 | 2.33329 |



|                    |               |            |         |
|--------------------|---------------|------------|---------|
| NM_181857          | Poln          | 0.00177964 | 2.33307 |
| BC057020           | Nbas          | 0.00107349 | 2.33121 |
| NM_174876          | Impg2         | 0.00642231 | 2.32988 |
| NM_023516          | 2310016C08Rik | 0.00439066 | 2.32895 |
| NM_010811          | Ndst2         | 0.00563253 | 2.32403 |
| NM_020263          | Cacna2d2      | 0.00940250 | 2.32025 |
| NM_198048          | Prx           | 0.00057322 | 2.3171  |
| NM_028233          | Lrpprc        | 0.00304540 | 2.30688 |
| BC053925           | Loxl4         | 0.00442799 | 2.3063  |
| ENSMUST00000043741 | Ank2          | 0.00855504 | 2.30164 |
| NM_030047          | 4930458L03Rik | 0.00804382 | 2.29969 |
| NM_172628          | Sh3tc2        | 0.00643042 | 2.29125 |
| NM_139138          | Emr4          | 0.00031016 | 2.28785 |
| NM_133994          | Gstt3         | 0.00358044 | 2.27275 |
| NM_001024926       | Cyb5d2        | 0.00620495 | 2.26869 |
| NM_028913          | Zfp819        | 0.00293823 | 2.26496 |
| NM_028326          | Zfp618        | 0.00745312 | 2.26494 |
| NM_008263          | Hoxa10        | 0.00069622 | 2.26198 |
| NM_019805          | Anapc7        | 0.00266705 | 2.2591  |
| NM_008817          | Peg3          | 0.00703356 | 2.2584  |
| NM_153579          | Sv2b          | 0.00575800 | 2.25824 |
| NM_011413          | C4a           | 0.00743215 | 2.2534  |
| NM_026496          | Grhl2         | 0.00911500 | 2.25061 |
| NM_028523          | Dcbld2        | 0.00969077 | 2.24862 |
| NM_177914          | Dgkk          | 0.00552580 | 2.24822 |
| NM_013627          | Pax6          | 0.00667145 | 2.21465 |
| NM_133750          | Fam118a       | 0.00992533 | 2.2142  |
| NM_139150          | Carf          | 0.00487717 | 2.21193 |
| NM_030185          | Zcchc4        | 0.00137811 | 2.21168 |
| NM_001081053       | Itga10        | 0.00758801 | 2.20856 |
| NM_022988          | Nif3l1        | 0.00330516 | 2.20525 |
| NM_026164          | Pnpla8        | 0.00693062 | 2.20283 |
| NM_144941          | Mtap7d1       | 0.00837372 | 2.2013  |
| NM_009440          | Tsx           | 0.00335955 | 2.1976  |
| NM_021896          | Gucy1a3       | 0.00485904 | 2.19607 |
| NM_133251          | Vgll1         | 0.00297766 | 2.19347 |
| NM_019988          | Mlst8         | 0.00405461 | 2.19332 |
| NM_011480          | Srebf1        | 0.00897676 | 2.19007 |
| NM_008977          | Ptpn2         | 0.00819205 | 2.17886 |
| NM_019709          | Mbtps1        | 0.00980952 | 2.17864 |
| NM_178896          | Dcun1d4       | 0.00068962 | 2.17695 |
| ENSMUST00000064841 | Gm9890        | 0.00689662 | 2.17144 |
| ENSMUST00000064141 | Dcaf17        | 0.00332896 | 2.16722 |
| NM_008441          | Kif1b         | 0.00732518 | 2.1672  |
| NM_029391          | Rab4b         | 0.00683673 | 2.16696 |
| NM_153578          | Nipa1         | 0.00594539 | 2.16171 |
| NM_001081374       | Prss36        | 0.00808275 | 2.15763 |
| XM_893664          | Gm6924        | 0.00547583 | 2.15329 |
| NM_001037751       | Defb48        | 0.00586635 | 2.15278 |

|                     |               |            |         |
|---------------------|---------------|------------|---------|
| NM_001144855        | Ppfi4         | 0.00346374 | 2.15235 |
| BC038663            | Rbm20         | 0.00588920 | 2.1517  |
| NM_197943           | Sgsm2         | 0.00104508 | 2.14927 |
| BC026808            | Fam54b        | 0.00331508 | 2.14915 |
| NM_172692           | Gba2          | 0.00040032 | 2.14693 |
| NM_019438           | Ncapg         | 0.00690842 | 2.14132 |
| BC072596            | 2700050L05Rik | 0.00776534 | 2.14106 |
| ENSMUST00000015889  | Plekho1       | 0.00657012 | 2.13302 |
| NM_198168           | Ppp2r5b       | 0.00679753 | 2.1307  |
| NM_027052           | Slc38a4       | 0.00161739 | 2.12593 |
| NM_027530           | Rufy3         | 0.00689131 | 2.12542 |
| AB101296            | Ovol2         | 0.00787023 | 2.12405 |
| BC065397            | BC065397      | 0.00556011 | 2.12344 |
| ENSMUST00000100769  | AU042671      | 0.00350324 | 2.11718 |
| NM_183014           | Zfp184        | 0.00467206 | 2.11443 |
| NM_207680           | Bcl2l11       | 0.00989268 | 2.11386 |
| NM_009347           | Tecta         | 0.00350583 | 2.11236 |
| AM748256            | Gm7455        | 0.00757405 | 2.10957 |
| NM_009517           | Zmat3         | 0.00957908 | 2.09677 |
| NM_176982           | Fbxo48        | 0.00073869 | 2.09183 |
| NM_028811           | Elp3          | 0.00221720 | 2.08999 |
| NM_001033792        | Gm5897        | 0.00030281 | 2.07904 |
| NM_010551           | Ii16          | 0.00346692 | 2.07843 |
| NM_011444           | Sox5          | 0.00543457 | 2.06569 |
| NM_001102430        | Arfgef1       | 0.00576840 | 2.0641  |
| NM_148948           | Dicer1        | 0.00580905 | 2.06265 |
| NM_025547           | Mterfd1       | 0.00257766 | 2.06204 |
| NM_001081241        | Fam65a        | 0.00422110 | 2.05895 |
| ENSMUST00000107472  | Mup3          | 0.00859822 | 2.04256 |
| NM_016695           | Mpp2          | 0.00633200 | 2.04208 |
| NM_030016           | Ccdc76        | 0.00173718 | 2.04018 |
| NM_175094           | Pdhx          | 0.00128529 | 2.03091 |
| NM_177186           | A530082C11Rik | 0.00919217 | 2.03017 |
| NM_007608           | Car5a         | 0.00916613 | 2.02937 |
| NM_023727           | Rd3           | 0.00744453 | 2.02927 |
| NM_177568           | Plcb2         | 0.00553031 | 2.02501 |
| NM_028404           | Top1mt        | 0.00527804 | 2.02339 |
| NM_007552           | Bmi1          | 0.00939361 | 2.02321 |
| NM_001112714        | Garnl1        | 0.00519872 | 2.02305 |
| NM_010889           | Neb           | 0.00321055 | 2.02163 |
| NM_021921           | Mapk8ip2      | 0.00564172 | 2.02043 |
| NM_010404           | Hap1          | 0.00183428 | 2.01597 |
| NM_145547           | Zfp189        | 0.00062886 | 2.01319 |
| NM_001037927        | Wdr93         | 0.00916325 | 2.01301 |
| NM_010680           | Lama3         | 0.00142367 | 2.01255 |
| ENSMUST000000061611 | Rps6kc1       | 0.00456730 | 2.01003 |
| NM_175210           | Abca12        | 0.00657566 | 2.00996 |
| NM_177580           | Baiap2l2      | 0.00365744 | 2.00634 |
| ENSMUST00000096648  | Nup98         | 0.00258127 | 2.00552 |

|                    |               |            |          |
|--------------------|---------------|------------|----------|
| NR_024051          | Abca16        | 0.00760698 | 2.00246  |
| NM_015732          | Axin2         | 0.00966979 | -2.0009  |
| NM_008078          | Gad2          | 0.00452178 | -2.00343 |
| NM_013659          | Sema4b        | 0.00005939 | -2.00369 |
| NM_177817          | Gm5089        | 0.00627528 | -2.00762 |
| NM_008804          | Pde9a         | 0.00103216 | -2.00844 |
| NM_021549          | Pnkp          | 0.00327129 | -2.01069 |
| NM_007721          | Ccr10         | 0.00066374 | -2.011   |
| NM_033613          | Dom3z         | 0.00572818 | -2.01245 |
| ENSMUST00000097527 | Tor1aip1      | 0.00754268 | -2.01866 |
| NM_001105245       | Pcdh19        | 0.00620474 | -2.02133 |
| NM_172893          | Parp12        | 0.00736700 | -2.02151 |
| NM_026748          | Ints1         | 0.00204044 | -2.02272 |
| NM_030746          | Btn3a3        | 0.00112860 | -2.02462 |
| NM_139148          | Clca4         | 0.00762215 | -2.02638 |
| NM_182716          | Nfasc         | 0.00288911 | -2.02999 |
| NM_009933          | Col6a1        | 0.00245865 | -2.03109 |
| NM_007965          | Evl           | 0.00728634 | -2.03377 |
| ENSMUST00000025719 | Mlana         | 0.00003678 | -2.03721 |
| NM_025949          | Rps6ka6       | 0.00505149 | -2.04646 |
| NM_001081065       | Zfp707        | 0.00406324 | -2.04655 |
| NM_198247          | Sertad4       | 0.00591517 | -2.04962 |
| NM_133895          | Slc15a4       | 0.00533397 | -2.05013 |
| NM_001037809       | Cdh3          | 0.00781316 | -2.05102 |
| NM_010775          | Mbl1          | 0.00708797 | -2.05363 |
| NM_001102405       | Acp5          | 0.00229529 | -2.05824 |
| NM_198018          | Abr           | 0.00991221 | -2.06379 |
| NM_010200          | Fgf13         | 0.00611748 | -2.06534 |
| NM_001113419       | Schip1        | 0.00645267 | -2.07283 |
| BC111102           | 4930431L04Rik | 0.00031410 | -2.07444 |
| NM_011180          | Cyth1         | 0.00590517 | -2.07774 |
| NM_025452          | Tmem54        | 0.00698243 | -2.07853 |
| NM_011424          | Ncor2         | 0.00080619 | -2.08453 |
| NM_031194          | Slc22a8       | 0.00469985 | -2.08528 |
| NM_198668          | 4930590J08Rik | 0.00500009 | -2.08654 |
| NM_173384          | Sox30         | 0.00319288 | -2.08983 |
| NM_009985          | Ctsw          | 0.00386682 | -2.09022 |
| NM_007729          | Col11a1       | 0.00560578 | -2.09276 |
| NM_177356          | Lamp3         | 0.00965333 | -2.09993 |
| BC152332           | 2310079F23Rik | 0.00234874 | -2.10278 |
| NM_027950          | Osgin1        | 0.00966753 | -2.10504 |
| NM_028636          | Man2c1        | 0.00514329 | -2.10699 |
| NM_001162432       | Lck           | 0.00823289 | -2.10748 |
| NM_001004155       | 9930012K11Rik | 0.00673029 | -2.10756 |
| NM_008486          | Anpep         | 0.00148300 | -2.11501 |
| NM_146121          | Rabgap1       | 0.00681009 | -2.11592 |
| NM_008319          | Icam5         | 0.00545264 | -2.11599 |
| NM_007819          | Cyp3a13       | 0.00913068 | -2.11657 |
| NM_001013411       | Nkain2        | 0.00340565 | -2.11679 |

|                    |               |            |          |
|--------------------|---------------|------------|----------|
| ENSMUST00000047373 | Sox15         | 0.00106021 | -2.12445 |
| BC046779           | Ttc28         | 0.00161127 | -2.12539 |
| NM_027154          | Tmbim1        | 0.00018823 | -2.12726 |
| NM_134152          | Lpxn          | 0.00453242 | -2.12975 |
| NM_033602          | Peli2         | 0.00625747 | -2.14103 |
| NM_031872          | Tas1r3        | 0.00701975 | -2.14532 |
| M87039             | Nos2          | 0.00159831 | -2.1521  |
| NM_026988          | Ptms          | 0.00058881 | -2.15271 |
| NM_001033385       | D630037F22Rik | 0.00364777 | -2.15751 |
| NM_009330          | Hnf1b         | 0.00745854 | -2.1587  |
| NM_145423          | Slc5a8        | 0.00241673 | -2.16012 |
| NM_007805          | Cyb561        | 0.00128196 | -2.16169 |
| BC022973           | Ankrd23       | 0.00288968 | -2.16283 |
| NM_001033217       | Prickle1      | 0.00332924 | -2.16332 |
| NM_022419          | Abhd8         | 0.00338209 | -2.164   |
| NM_198059          | Nrap          | 0.00685215 | -2.16751 |
| NM_153106          | Padi6         | 0.00646291 | -2.16828 |
| NM_009930          | Col3a1        | 0.00778735 | -2.17172 |
| AF004874           | Ltbp2         | 0.00092174 | -2.17228 |
| NM_178051          | Mterfd2       | 0.00872210 | -2.17582 |
| NM_027881          | Osbpl3        | 0.00157985 | -2.17666 |
| AF155880           | Runx3         | 0.00075991 | -2.18584 |
| NM_172393          | Aim1          | 0.00955203 | -2.18759 |
| BC030862           | Muc2          | 0.00298615 | -2.18892 |
| NM_021287          | Spnb3         | 0.00795065 | -2.19487 |
| NM_001081175       | Itpkb         | 0.00593649 | -2.19543 |
| NM_019963          | Stat2         | 0.00860056 | -2.20088 |
| NM_011373          | St6galnac4    | 0.00782006 | -2.20253 |
| NM_175473          | Fras1         | 0.00184561 | -2.20749 |
| ENSMUST00000081074 | 4932411N23Rik | 0.00599596 | -2.20846 |
| NM_022883          | Lpin3         | 0.00211335 | -2.20957 |
| NM_177213          | Abca15        | 0.00843965 | -2.2106  |
| NM_027406          | Aldh1l1       | 0.00539320 | -2.21145 |
| AK006404           | 1700027A07Rik | 0.00038800 | -2.22091 |
| NM_173755          | Ube2o         | 0.00816802 | -2.22369 |
| NM_146094          | Fads1         | 0.00658537 | -2.22848 |
| NM_001161790       | Mefv          | 0.00568710 | -2.23537 |
| BC016568           | Tmed1         | 0.00640981 | -2.24108 |
| NM_010657          | Hivep3        | 0.00758041 | -2.24302 |
| NM_021306          | Ecel1         | 0.00129338 | -2.24466 |
| NM_031187          | Tpsab1        | 0.00539786 | -2.24856 |
| BC138108           | B930007M17Rik | 0.00965967 | -2.25715 |
| NM_027035          | 1700001L19Rik | 0.00988037 | -2.25838 |
| NM_175430          | Ccdc40        | 0.00311315 | -2.26273 |
| AF064749           | Col6a3        | 0.00818034 | -2.26532 |
| AK015688           | 4930503E24Rik | 0.00721055 | -2.26673 |
| NM_178418          | Ccdc144b      | 0.00279580 | -2.27555 |
| NM_008520          | Ltbp3         | 0.00592732 | -2.27792 |
| NM_027827          | Afmid         | 0.00097669 | -2.27841 |

|                    |               |            |          |
|--------------------|---------------|------------|----------|
| NM_026720          | Ankrd13d      | 0.00620706 | -2.285   |
| NM_172294          | Sulf1         | 0.00381848 | -2.2904  |
| NM_183224          | Fam19a3       | 0.00109016 | -2.29081 |
| NM_010150          | Nr2f6         | 0.00629678 | -2.29293 |
| NM_001081333       | Plekhg4       | 0.00031890 | -2.29557 |
| NM_026132          | Txndc8        | 0.00395634 | -2.29665 |
| NM_172731          | Fgd5          | 0.00904267 | -2.29897 |
| NM_030744          | Ropn1         | 0.00300312 | -2.31856 |
| AK075676           | Fbxw17        | 0.00697557 | -2.32479 |
| NM_177652          | Ryr3          | 0.00421278 | -2.32995 |
| NM_001033344       | Dusp27        | 0.00700312 | -2.3587  |
| NM_001081087       | Kbtbd10       | 0.00726175 | -2.36469 |
| NM_026272          | Narf          | 0.00750762 | -2.37097 |
| NM_008398          | Itga7         | 0.00814237 | -2.37167 |
| NM_015812          | Rgs6          | 0.00684334 | -2.3763  |
| NM_172537          | Sema6d        | 0.00389498 | -2.38763 |
| NM_008779          | Cntn3         | 0.00804862 | -2.39397 |
| ENSMUST00000023846 | 4933430H15Rik | 0.00395578 | -2.40086 |
| NM_172571          | Fbf1          | 0.00000403 | -2.40662 |
| NM_025449          | Nicn1         | 0.00362272 | -2.41618 |
| NM_178930          | Gbf1          | 0.00065330 | -2.41889 |
| NM_001161665       | Kif26b        | 0.00166206 | -2.42005 |
| NM_023868          | Ryr2          | 0.00856740 | -2.42018 |
| NM_008604          | Mme           | 0.00305484 | -2.42616 |
| NM_211138          | Pcyl1b        | 0.00212974 | -2.43004 |
| NM_019945          | Mast1         | 0.00717784 | -2.43181 |
| NM_009539          | Zap70         | 0.00748349 | -2.43511 |
| NM_010099          | Eda           | 0.00025418 | -2.43618 |
| NM_177845          | Pla2g4e       | 0.00701995 | -2.44036 |
| ENSMUST00000099432 | Gm10777       | 0.00727589 | -2.44839 |
| NM_001080816       | Bclp2         | 0.00348079 | -2.45854 |
| NM_011511          | Abcc9         | 0.00348052 | -2.45881 |
| NM_001159405       | Llgl1         | 0.00104813 | -2.46502 |
| NM_001033263       | Agap2         | 0.00397663 | -2.4674  |
| BC066021           | Gm166         | 0.00356671 | -2.47916 |
| NM_054055          | Slc13a3       | 0.00176598 | -2.48206 |
| NM_024192          | Cuedc2        | 0.00853509 | -2.48712 |
| NM_172903          | Man2a2        | 0.00571676 | -2.48948 |
| NM_134420          | Slc26a6       | 0.00654929 | -2.49367 |
| NM_012016          | Ern2          | 0.00991868 | -2.49597 |
| NM_134072          | Akr1c14       | 0.00862325 | -2.50012 |
| NM_001013774       | Kpna7         | 0.00902285 | -2.50361 |
| NM_153413          | Dock3         | 0.00247956 | -2.50582 |
| NM_133862          | Fgg           | 0.00879394 | -2.50769 |
| NM_023580          | Epha1         | 0.00753533 | -2.5097  |
| NM_178116          | Camta2        | 0.00869387 | -2.5128  |
| NM_019581          | Gtpbp2        | 0.00492652 | -2.52443 |
| NM_021506          | Sh3rf1        | 0.00360751 | -2.52563 |
| NM_023370          | Cdh23         | 0.00487204 | -2.54251 |

|                    |               |            |          |
|--------------------|---------------|------------|----------|
| NM_178689          | 6430537H07Rik | 0.00581351 | -2.54305 |
| AK129214           | Adnp          | 0.00699943 | -2.54332 |
| NM_013680          | Syn1          | 0.00579601 | -2.54599 |
| ENSMUST00000110306 | Dpys          | 0.00584198 | -2.54988 |
| NM_001081109       | Lmtk2         | 0.00895813 | -2.55621 |
| NM_175678          | Npsr1         | 0.00822365 | -2.55845 |
| NM_153125          | Sec16a        | 0.00562897 | -2.56241 |
| NM_153598          | Ugt2b34       | 0.00375405 | -2.56837 |
| NM_001111304       | Tbc1d9        | 0.00868099 | -2.57777 |
| NM_016697          | Gpc3          | 0.00798602 | -2.58423 |
| NM_008353          | Ii12rb1       | 0.00228894 | -2.58858 |
| NM_010514          | Igf2          | 0.00639037 | -2.58868 |
| NM_175214          | Kif27         | 0.00327071 | -2.59096 |
| ENSMUST00000023696 | Synj1         | 0.00990399 | -2.59622 |
| NM_001081178       | Gpr116        | 0.00398026 | -2.59989 |
| NM_178748          | Egflam        | 0.00342248 | -2.60138 |
| NM_181569          | Mare          | 0.00422693 | -2.61397 |
| NM_153417          | Trpm6         | 0.00283429 | -2.63378 |
| NM_026972          | Cd209b        | 0.00843105 | -2.63379 |
| NM_133930          | Creld1        | 0.00875101 | -2.6341  |
| NM_013813          | Epb4.1l3      | 0.00636668 | -2.64917 |
| NM_177644          | Rasal2        | 0.00192837 | -2.65013 |
| NM_001013380       | Dync1li2      | 0.00925264 | -2.65549 |
| NM_011109          | Pla2g2d       | 0.00690299 | -2.66381 |
| NM_029604          | 1700027A23Rik | 0.00539153 | -2.66517 |
| NM_001029985       | Kcp           | 0.00413135 | -2.69619 |
| NM_028882          | Sema3d        | 0.00224878 | -2.69625 |
| NM_009375          | Tg            | 0.00506232 | -2.69753 |
| NM_207220          | Gpr137        | 0.00947589 | -2.69939 |
| NM_001085509       | Myom3         | 0.00044227 | -2.70465 |
| NM_178079          | Pm20d1        | 0.00089203 | -2.71285 |
| NM_007742          | Col1a1        | 0.00040559 | -2.71535 |
| NM_001145803       | Mak           | 0.00304064 | -2.71604 |
| NM_001001326       | St5           | 0.00146986 | -2.71854 |
| NM_183221          | Fat4          | 0.00382468 | -2.74312 |
| ENSMUST00000058791 | Skint2        | 0.00883850 | -2.74922 |
| NM_144789          | Prdm15        | 0.00859702 | -2.7511  |
| BC024359           | Mkks          | 0.00464059 | -2.75298 |
| NM_029733          | 2010005H15Rik | 0.00654507 | -2.76058 |
| NM_001012765       | Adcy5         | 0.00854370 | -2.76401 |
| NM_021544          | Scn5a         | 0.00900048 | -2.77245 |
| NM_198020          | Trmt1         | 0.00159724 | -2.77247 |
| NM_001076554       | Spna2         | 0.00427076 | -2.7752  |
| BC147608           | 4933422H20Rik | 0.00348887 | -2.7837  |
| NM_001001883       | Hecw2         | 0.00266731 | -2.79133 |
| NM_031386          | Tex14         | 0.00532198 | -2.79313 |
| NM_028981          | Cacna1d       | 0.00022236 | -2.79669 |
| NM_147218          | Abca6         | 0.00301439 | -2.79745 |
| XM_985548          | Syngap1       | 0.00872368 | -2.79766 |

|                    |               |            |          |
|--------------------|---------------|------------|----------|
| NM_145431          | Nle1          | 0.00701075 | -2.81163 |
| NM_133236          | Glcci1        | 0.00975902 | -2.84831 |
| ENSMUST00000095527 | Gm6772        | 0.00541657 | -2.85725 |
| ENSMUST00000109463 | Sult4a1       | 0.00753646 | -2.85749 |
| NM_001159571       | Ephb4         | 0.00468837 | -2.86958 |
| NM_080639          | Timp4         | 0.00200728 | -2.88462 |
| NM_013931          | Mapk8ip3      | 0.00977953 | -2.92029 |
| NM_027476          | Zdhhc24       | 0.00280720 | -2.92244 |
| NM_007950          | Ereg          | 0.00623045 | -2.93061 |
| XM_983257          | Gm9571        | 0.00548810 | -2.93107 |
| NM_148943          | Usp9y         | 0.00490587 | -2.94451 |
| NM_001033209       | Xylb          | 0.00616080 | -2.94726 |
| ENSMUST00000098484 | 4930579C12Rik | 0.00876759 | -2.96285 |
| AK165113           | Prlr          | 0.00211865 | -2.96424 |
| NM_009472          | Unc5c         | 0.00593284 | -2.96946 |
| NM_028270          | Aldh1b1       | 0.00039727 | -2.97445 |
| NM_010585          | Itpr1         | 0.00095952 | -3.00979 |
| NM_022413          | Trpv6         | 0.00124650 | -3.05079 |
| NM_001024136       | Anks6         | 0.00204602 | -3.05459 |
| NM_001099288       | AU040829      | 0.00203839 | -3.05541 |
| NM_152839          | Igj           | 0.00715107 | -3.05629 |
| NM_001102411       | Kng1          | 0.00962143 | -3.06474 |
| NM_009288          | Stk10         | 0.00883497 | -3.07918 |
| NM_011985          | Mmp23         | 0.00536911 | -3.08733 |
| NM_021889          | Syt9          | 0.00243522 | -3.10415 |
| NM_134082          | Farp1         | 0.00443725 | -3.10648 |
| NM_008485          | Lamc2         | 0.00484804 | -3.12863 |
| NM_001113323       | Glb1l3        | 0.00366986 | -3.12872 |
| NM_145525          | Osbpl6        | 0.00500148 | -3.13246 |
| NM_009741          | Bcl2          | 0.00419311 | -3.13804 |
| NM_008291          | Hsd17b3       | 0.00743730 | -3.14481 |
| NM_011403          | Slc4a1        | 0.00365250 | -3.14615 |
| NM_011412          | Slit3         | 0.00838820 | -3.1465  |
| NM_001044308       | Cacna1i       | 0.00205580 | -3.16309 |
| NM_001013762       | Gm4952        | 0.00521638 | -3.17418 |
| NM_007778          | Csf1          | 0.00323744 | -3.19018 |
| NM_001162970       | Aim1l         | 0.00332978 | -3.21212 |
| NM_026557          | Rchy1         | 0.00835919 | -3.2484  |
| NM_153139          | Slc36a1       | 0.00925306 | -3.25509 |
| NM_181853          | Trim66        | 0.00134733 | -3.26073 |
| NM_001113198       | Mitf          | 0.00035458 | -3.2656  |
| BC053100           | 5730559C18Rik | 0.00615670 | -3.27875 |
| NM_033552          | Slc4a10       | 0.00291103 | -3.28253 |
| NM_019417          | Pdlim4        | 0.00466272 | -3.29047 |
| NM_028421          | Zc3hav1       | 0.00074924 | -3.29639 |
| NM_172831          | E230025N22Rik | 0.00193439 | -3.31618 |
| NM_001136065       | Hipk2         | 0.00467570 | -3.32039 |
| NM_001081688       | Tmprss9       | 0.00866706 | -3.3375  |
| NM_001081084       | Cubn          | 0.00930357 | -3.34656 |

|                    |               |            |          |
|--------------------|---------------|------------|----------|
| NM_146258          | Stard13       | 0.00445003 | -3.36649 |
| BC147178           | A430084P05Rik | 0.00351078 | -3.3707  |
| NM_010204          | Fgf6          | 0.00517794 | -3.37141 |
| NM_009463          | Ucp1          | 0.00042299 | -3.38652 |
| NM_013920          | Hnf4g         | 0.00810111 | -3.40253 |
| BC099580           | 1700057K13Rik | 0.00123723 | -3.43186 |
| NM_001081091       | Cep152        | 0.00617512 | -3.44502 |
| NM_001102474       | Skint3        | 0.00734792 | -3.45361 |
| NM_183000          | Accn3         | 0.00005265 | -3.45397 |
| NM_026835          | Ms4a6d        | 0.00173652 | -3.46345 |
| NM_001040111       | Arap1         | 0.00366261 | -3.47213 |
| NM_133987          | Slc6a8        | 0.00791081 | -3.48584 |
| NM_145932          | Osta          | 0.00092189 | -3.51596 |
| NM_007397          | Acvr2b        | 0.00363512 | -3.5934  |
| NM_001081414       | Grm5          | 0.00551335 | -3.59973 |
| BC130272           | Fam65c        | 0.00997374 | -3.60624 |
| NM_203508          | Fam12         | 0.00352481 | -3.60772 |
| ENSMUST00000100079 | Ly75          | 0.00128985 | -3.60794 |
| NM_001111027       | Runx1t1       | 0.00333439 | -3.63593 |
| NM_019471          | Mmp10         | 0.00038599 | -3.63701 |
| NM_146001          | Hip1          | 0.00275255 | -3.63757 |
| NM_007864          | Dlg4          | 0.00021934 | -3.6377  |
| NM_007702          | Cidea         | 0.00214630 | -3.67869 |
| NM_001081390       | Palld         | 0.00993526 | -3.74557 |
| NM_001081035       | Nav3          | 0.00487705 | -3.75779 |
| NM_001100395       | Otof          | 0.00784378 | -3.80809 |
| ENSMUST00000065125 | 4930451C15Rik | 0.00383835 | -3.81875 |
| NM_008447          | Kif5a         | 0.00167263 | -3.84868 |
| NM_024432          | Ubxn6         | 0.00596229 | -3.89543 |
| NM_009704          | Areg          | 0.00802399 | -3.90473 |
| NM_080854          | Slc34a3       | 0.00749096 | -3.91957 |
| NM_001037865       | Col28a1       | 0.00962134 | -3.93477 |
| NM_027062          | C8g           | 0.00722808 | -3.95098 |
| NM_009782          | Cacna1e       | 0.00372868 | -3.96205 |
| NM_019507          | Tbx21         | 0.00464970 | -3.97019 |
| NM_146191          | Lrrk1         | 0.00232479 | -3.97345 |
| NM_008882          | Plxna2        | 0.00225725 | -4.0486  |
| NM_170684          | Cpne7         | 0.00192464 | -4.12112 |
| NM_023617          | Aox3          | 0.00662524 | -4.12717 |
| BC023699           | Atpgd1        | 0.00505439 | -4.17178 |
| NM_029847          | Arsk          | 0.00573728 | -4.17546 |
| NM_053079          | Slc15a1       | 0.00022755 | -4.19093 |
| NM_029465          | Clec4g        | 0.00127785 | -4.23494 |
| NM_001004061       | Fam170a       | 0.00775501 | -4.2355  |
| NM_028980          | Ppp4r4        | 0.00125036 | -4.26165 |
| NM_028034          | Tdrd12        | 0.00908015 | -4.36505 |
| NM_019467          | Aif1          | 0.00681504 | -4.41921 |
| NM_028715          | Fcho1         | 0.00988497 | -4.45013 |
| NM_008512          | Lrp1          | 0.00038414 | -4.48259 |



|                    |               |            |          |
|--------------------|---------------|------------|----------|
| NM_177117          | Dlec1         | 0.00006323 | -4.51601 |
| NM_053011          | Lrp1b         | 0.00397935 | -4.52126 |
| NM_001081292       | Map3k10       | 0.00276739 | -4.58531 |
| NM_001081185       | Flnc          | 0.00538267 | -4.6047  |
| AK122464           | Plekhh1       | 0.00098546 | -4.70347 |
| NM_009036          | Rbpjl         | 0.00741424 | -4.70984 |
| NM_009619          | Adam3         | 0.00069977 | -4.87767 |
| AJ491857           | Sspo          | 0.00723764 | -4.92937 |
| NM_029372          | 1700011F14Rik | 0.00295692 | -4.92966 |
| ENSMUST00000094950 | Pgap1         | 0.00399215 | -5.10525 |
| NM_020606          | Parva         | 0.00586851 | -5.20248 |
| NM_030026          | Mccc2         | 0.00077238 | -5.22805 |
| NM_013919          | Usp21         | 0.00115195 | -5.25496 |
| NM_027990          | Lypd6b        | 0.00308669 | -5.50117 |
| NM_080470          | Smc1b         | 0.00139413 | -5.51    |
| NM_201407          | Dennd4b       | 0.00235899 | -5.65283 |
| ENSMUST00000115200 | Nrf1          | 0.00060323 | -5.70095 |
| ENSMUST00000043406 | Nox4          | 0.00835128 | -5.72915 |
| NM_173023          | Catsperb      | 0.00176915 | -5.78812 |
| BC099618           | Igh-6         | 0.00157219 | -6.06717 |
| NM_008340          | Igfals        | 0.00166573 | -6.07172 |
| NM_011941          | Mapkbp1       | 0.00512104 | -6.21263 |
| NM_172671          | Lgr4          | 0.00554593 | -6.27445 |
| NM_009757          | Bmp15         | 0.00193539 | -6.63897 |
| NM_009109          | Ryr1          | 0.00030798 | -7.24409 |
| NM_144850          | Rapgef3       | 0.00063220 | -7.31513 |
| ENSMUST00000018993 | Wwc1          | 0.00899212 | -7.39885 |
| NM_010863          | Myo1b         | 0.00232410 | -8.07146 |
| NM_172862          | Frem2         | 0.00838941 | -8.26939 |
| ENSMUST00000103380 | LOC100047070  | 0.00298262 | -8.94678 |
| NM_027759          | Fsip1         | 0.00885647 | -10.7575 |
| NM_145499          | Cyp2c70       | 0.00333836 | -18.6819 |

Public ID and gene symbols of differentially expressed (> 2-fold,  $p < 0.01$ ) genes are shown. In cases multiple probes correspond to the same gene, the result from probe that showed least p value without discrepancy in the up- or down-regulation is shown.

**Table S4. The list of all differentially expressed (> 2-fold, p<0.01) genes in MEP cells**

| Public ID          | Gene Symbol   | P value    | Fold change |
|--------------------|---------------|------------|-------------|
| NM_153533          | Tenc1         | 0.00553511 | 10.9473     |
| NM_001081129       | Cntnap3       | 0.00056736 | 8.70436     |
| NM_030025          | Ccdc150       | 0.00784714 | 8.2626      |
| ENSMUST00000049703 | 4930503B20Rik | 0.00132755 | 7.44436     |
| NM_182716          | Nfasc         | 0.00141076 | 7.03913     |
| NM_011510          | Abcc8         | 0.00648485 | 6.46512     |
| NM_133657          | Cyp2a12       | 0.00323696 | 6.44811     |
| NM_016927          | Pkd2l2        | 0.00502266 | 6.37472     |
| ENSMUST00000098484 | 4930579C12Rik | 0.00330199 | 6.06608     |
| NM_018744          | Sema6a        | 0.00515062 | 5.97448     |
| NM_001081250       | Myh13         | 0.00238773 | 5.84077     |
| NM_054103          | Stk33         | 0.00025704 | 5.78009     |
| NM_013491          | Clcn1         | 0.00325664 | 5.77981     |
| NM_178396          | Car12         | 0.00113361 | 5.7303      |
| NM_207683          | Pik3c2g       | 0.00503511 | 5.72728     |
| NM_026458          | Abca14        | 0.00402712 | 5.59412     |
| NM_198649          | Ablim3        | 0.00121710 | 5.58875     |
| NM_028266          | Col16a1       | 0.00731708 | 5.4001      |
| ENSMUST00000062827 | 1520401A03Rik | 0.00621115 | 5.33699     |
| NM_134028          | Tubg2         | 0.00311095 | 5.29471     |
| NM_009512          | Slc27a5       | 0.00004659 | 5.13352     |
| NM_146001          | Hip1          | 0.00117670 | 5.04245     |
| NM_007729          | Col11a1       | 0.00712239 | 4.89573     |
| NM_001104946       | Gm2012        | 0.00579479 | 4.86863     |
| NM_028981          | Cacna1d       | 0.00432566 | 4.79181     |
| NM_010018          | Dao           | 0.00249345 | 4.53533     |
| NM_001122635       | 1700021K14Rik | 0.00627906 | 4.53188     |
| NM_028957          | Hyal5         | 0.00526927 | 4.53159     |
| NM_172696          | Inadl         | 0.00780564 | 4.46563     |
| NM_134160          | Mcoln3        | 0.00758010 | 4.45004     |
| NM_028624          | 1110017D15Rik | 0.00879034 | 4.42051     |
| NM_130452          | Bbox1         | 0.00555148 | 4.36666     |
| NM_010007          | Cyp2j5        | 0.00937482 | 4.3086      |
| AK049811           | 5730410E15Rik | 0.00129435 | 4.28844     |
| NM_145388          | Best2         | 0.00439278 | 4.2766      |
| NM_053193          | Cpsf1         | 0.00259807 | 4.25052     |
| NM_019784          | Tex21         | 0.00686084 | 4.22597     |
| NM_008291          | Hsd17b3       | 0.00329524 | 4.1984      |
| NM_181988          | Rerg          | 0.00556340 | 4.16698     |
| NM_025807          | Slc16a9       | 0.00734526 | 4.16693     |
| NM_053271          | Rims2         | 0.00923118 | 4.14285     |
| NM_177756          | Glt25d2       | 0.00387738 | 4.08928     |
| AK053964           | Ltbp1         | 0.00620776 | 3.96429     |
| NM_175448          | Rlbp1l2       | 0.00240871 | 3.93726     |
| NM_054053          | Gpr98         | 0.00252416 | 3.84135     |
| NM_017396          | Cyp3a41a      | 0.00037961 | 3.83069     |

|                    |               |            |         |
|--------------------|---------------|------------|---------|
| NM_001033541       | Gm5127        | 0.00686723 | 3.79737 |
| NM_009420          | Crisp2        | 0.00538972 | 3.75265 |
| NM_147219          | Abca5         | 0.00568966 | 3.71218 |
| NM_053270          | Rims1         | 0.00651091 | 3.70274 |
| NM_013839          | Nr1h3         | 0.00296621 | 3.66605 |
| NM_008032          | Aff2          | 0.00315856 | 3.65171 |
| NM_001033269       | Eif4e1b       | 0.00568336 | 3.64941 |
| NM_007980          | Fabp2         | 0.00887235 | 3.57383 |
| NM_018852          | Scn9a         | 0.00377790 | 3.56577 |
| NM_008941          | Prss7         | 0.00106308 | 3.5405  |
| NM_007736          | Col4a5        | 0.00770506 | 3.49928 |
| NM_175750          | Plxna4        | 0.00180015 | 3.44127 |
| NM_173023          | Catsperb      | 0.00655291 | 3.42157 |
| NM_207657          | 5031410I06Rik | 0.00024082 | 3.4165  |
| NM_178655          | Ank2          | 0.00301302 | 3.41059 |
| NM_080510          | Trim69        | 0.00487556 | 3.39639 |
| NM_001081033       | Pde11a        | 0.00959289 | 3.36591 |
| ENSMUST00000097884 | Csmd2         | 0.00746771 | 3.35117 |
| NM_001146292       | Brunol4       | 0.00687959 | 3.34761 |
| NM_028938          | Lrriq3        | 0.00122695 | 3.34682 |
| NM_013920          | Hnf4g         | 0.00857460 | 3.33635 |
| NM_021604          | Agrn          | 0.00461172 | 3.32529 |
| NM_025744          | 4933404M02Rik | 0.00963495 | 3.32369 |
| NM_013773          | Tcl1b1        | 0.00979159 | 3.31042 |
| NM_053011          | Lrp1b         | 0.00922478 | 3.29677 |
| NM_001083897       | Mpzl1         | 0.00480827 | 3.2843  |
| NM_001029987       | Doxl2         | 0.00931897 | 3.27361 |
| NM_012033          | Tinag         | 0.00558143 | 3.26532 |
| NM_007738          | Col7a1        | 0.00777597 | 3.23921 |
| BC068128           | AI118078      | 0.00853229 | 3.23769 |
| ENSMUST00000107287 | Ptprd         | 0.00429763 | 3.22702 |
| NM_019945          | Mast1         | 0.00265987 | 3.21292 |
| NM_007814          | Cyp2b19       | 0.00866158 | 3.20698 |
| NM_177002          | C730048C13Rik | 0.00712685 | 3.18747 |
| NM_001039557       | 4922505G16Rik | 0.00069265 | 3.1805  |
| NM_009109          | Ryr1          | 0.00572413 | 3.15415 |
| NM_172277          | Snx8          | 0.00962532 | 3.14322 |
| NM_009399          | Tnfrsf11a     | 0.00267033 | 3.09397 |
| NM_001142804       | Acss3         | 0.00780405 | 3.07082 |
| NM_007734          | Col4a3        | 0.00349567 | 3.06151 |
| NM_007760          | Crat          | 0.00630713 | 3.0186  |
| NM_030599          | Klrb1b        | 0.00522688 | 3.0072  |
| NM_172775          | Plxnb1        | 0.00138958 | 3.00542 |
| BC120488           | AU021034      | 0.00362697 | 2.97526 |
| NM_021486          | Bcmo1         | 0.00984832 | 2.96437 |
| NM_013462          | Adrb3         | 0.00447236 | 2.95392 |
| NM_033526          | Ubqln4        | 0.00063336 | 2.93995 |
| NM_019587          | Plxnb3        | 0.00147110 | 2.93859 |
| NM_172570          | Trim47        | 0.00885782 | 2.90344 |

|                    |               |            |         |
|--------------------|---------------|------------|---------|
| NM_018732          | Scn3a         | 0.00294717 | 2.89347 |
| NM_172867          | Zfp462        | 0.00043589 | 2.84471 |
| NM_054073          | Tsga13        | 0.00523521 | 2.83498 |
| NM_001105252       | Tmc5          | 0.00877844 | 2.83301 |
| NM_148950          | Pknox2        | 0.00199144 | 2.82307 |
| NM_029444          | Six6os1       | 0.00222311 | 2.79915 |
| NM_172294          | Sulf1         | 0.00319249 | 2.79246 |
| NM_177376          | Myo3b         | 0.00773086 | 2.78115 |
| NM_183116          | 1110021L09Rik | 0.00422688 | 2.76382 |
| NM_007870          | Dnase1l3      | 0.00599369 | 2.75982 |
| XM_001478028       | Lrrig1        | 0.00213951 | 2.74187 |
| BC090250           | 9930023K05Rik | 0.00317401 | 2.73517 |
| NM_029983          | Sla2          | 0.00593610 | 2.73049 |
| NM_019581          | Gtpbp2        | 0.00370718 | 2.7212  |
| NM_028946          | Nhedc1        | 0.00198772 | 2.71526 |
| NM_199021          | Dpp10         | 0.00638089 | 2.71    |
| ENSMUST00000064948 | Dnahc6        | 0.00522192 | 2.70524 |
| ENSMUST00000033625 | 4930513O06Rik | 0.00148516 | 2.7004  |
| NM_033552          | Slc4a10       | 0.00564466 | 2.69583 |
| NM_008310          | Htr1f         | 0.00637906 | 2.67674 |
| NM_138305          | Adcy3         | 0.00416282 | 2.66309 |
| NM_008646          | Cpamd8        | 0.00624055 | 2.6431  |
| NM_026625          | 1700067P10Rik | 0.00419344 | 2.63983 |
| NM_001128086       | Anks1b        | 0.00456437 | 2.61998 |
| BC110558           | Plac8l1       | 0.00556304 | 2.54916 |
| NM_175506          | Adamts19      | 0.00390723 | 2.54646 |
| BC100412           | 1700001E04Rik | 0.00095912 | 2.53236 |
| NM_028733          | Pacsin3       | 0.00453709 | 2.53107 |
| AK030119           | 4932443G14    | 0.00244700 | 2.52648 |
| NM_001013024       | Usp13         | 0.00447326 | 2.51563 |
| ENSMUST00000070189 | Lrguk         | 0.00900321 | 2.51508 |
| NM_001024142       | Fbxo10        | 0.00459318 | 2.51128 |
| NM_172857          | Exd1          | 0.00291189 | 2.50831 |
| ENSMUST00000046993 | Dnahc3        | 0.00993089 | 2.50176 |
| NM_146587          | Olf1023       | 0.00519898 | 2.50066 |
| AB197927           | 2010317E24Rik | 0.00458282 | 2.49452 |
| NM_001159297       | Gcet2         | 0.00699809 | 2.48324 |
| NM_009641          | Angpt4        | 0.00270046 | 2.47561 |
| ENSMUST00000048572 | Hlx           | 0.00608543 | 2.46954 |
| ENSMUST00000112911 | Gm6432        | 0.00031014 | 2.45936 |
| NM_053098          | Lmod2         | 0.00856549 | 2.45673 |
| ENSMUST00000009214 | Rtdr1         | 0.00299471 | 2.45277 |
| NM_021400          | Prg4          | 0.00067365 | 2.44982 |
| NM_172859          | 6330439K17Rik | 0.00841585 | 2.44756 |
| NM_198167          | Tmem63b       | 0.00846329 | 2.44232 |
| NM_019392          | Tyro3         | 0.00197466 | 2.43839 |
| ENSMUST00000107934 | Shank1        | 0.00703160 | 2.43456 |
| NM_183307          | Ccdc63        | 0.00907176 | 2.43359 |
| NM_009619          | Adam3         | 0.00617635 | 2.42371 |

|                    |               |            |         |
|--------------------|---------------|------------|---------|
| NM_027669          | Sept12        | 0.00023786 | 2.42324 |
| NM_153400          | P2rx2         | 0.00052594 | 2.41584 |
| NM_001033428       | Tmem211       | 0.00575682 | 2.40945 |
| ENSMUST00000096347 | Enthd1        | 0.00415539 | 2.40898 |
| NM_021408          | Ush2a         | 0.00931839 | 2.40053 |
| NM_177388          | Slc41a2       | 0.00867383 | 2.39575 |
| NM_007938          | Epha6         | 0.00872754 | 2.39461 |
| NM_015734          | Col5a1        | 0.00894113 | 2.39243 |
| NM_001001883       | Hecw2         | 0.00487824 | 2.38939 |
| BC016112           | Col20a1       | 0.00424869 | 2.38018 |
| NM_199465          | Nexn          | 0.00672377 | 2.37982 |
| NM_177905          | Piwil4        | 0.00927214 | 2.37833 |
| NM_146631          | Olfr120       | 0.00295123 | 2.3693  |
| ENSMUST00000028062 | Vim           | 0.00885383 | 2.36922 |
| NM_029614          | Prss23        | 0.00080409 | 2.36922 |
| NM_010623          | Kif17         | 0.00882545 | 2.36435 |
| NM_001100182       | Cyp2j12       | 0.00906955 | 2.35403 |
| NM_207654          | Efna5         | 0.00528884 | 2.34889 |
| NM_134023          | Tbc1d10a      | 0.00277404 | 2.34216 |
| AK016739           | 4933408J17Rik | 0.00491548 | 2.3407  |
| ENSMUST00000118246 | Synj1         | 0.00297386 | 2.32696 |
| NM_001105191       | Vmn2r52       | 0.00326888 | 2.32348 |
| NM_009118          | Sag           | 0.00732683 | 2.32172 |
| NM_001081242       | Tln2          | 0.00210715 | 2.31328 |
| NM_025989          | Gp2           | 0.00662521 | 2.30366 |
| NM_009916          | Ccr4          | 0.00176901 | 2.29985 |
| NM_021489          | F12           | 0.00377723 | 2.29825 |
| NM_175535          | Arhgap20      | 0.00123068 | 2.29592 |
| NM_011511          | Abcc9         | 0.00469685 | 2.2908  |
| NM_153067          | Mrgpra3       | 0.00494038 | 2.29044 |
| NM_181591          | Txndc3        | 0.00641101 | 2.28857 |
| NM_133882          | C8b           | 0.00666046 | 2.26729 |
| NM_023868          | Ryr2          | 0.00252649 | 2.26386 |
| ENSMUST00000088896 | Tmcc1         | 0.00445031 | 2.25436 |
| ENSMUST00000041220 | Zhx3          | 0.00719769 | 2.2384  |
| NM_080728          | Myh7          | 0.00751925 | 2.22218 |
| ENSMUST00000056994 | 4921513I03Rik | 0.00043928 | 2.21503 |
| NM_177265          | 6330512M04Rik | 0.00943432 | 2.21349 |
| NM_177664          | D3Bwg0562e    | 0.00568169 | 2.20852 |
| NM_008596          | Sypl2         | 0.00121241 | 2.20656 |
| NM_144794          | Tmem63a       | 0.00298286 | 2.18198 |
| ENSMUST00000048678 | Lss           | 0.00151207 | 2.17296 |
| NM_025489          | Dnajc5b       | 0.00115849 | 2.17269 |
| ENSMUST00000091023 | 4930589L23Rik | 0.00101780 | 2.16926 |
| NM_032005          | Tbx19         | 0.00640615 | 2.16    |
| NM_011167          | PrI8a6        | 0.00581252 | 2.15919 |
| NM_001033199       | AI747448      | 0.00683022 | 2.15478 |
| NM_207204          | Ninl          | 0.00073614 | 2.15173 |
| NM_011537          | Tbx5          | 0.00220640 | 2.14128 |

|                    |               |            |          |
|--------------------|---------------|------------|----------|
| NM_008354          | Il12rb2       | 0.00557564 | 2.12005  |
| BC151034           | Pdzrn4        | 0.00271544 | 2.10559  |
| NM_177030          | Dock6         | 0.00312011 | 2.10233  |
| NM_144890          | BC018465      | 0.00459914 | 2.09654  |
| NM_027971          | Serpinb12     | 0.00209503 | 2.09427  |
| NM_080455          | Tshz2         | 0.00219433 | 2.0919   |
| ENSMUST00000085554 | C130038G02Rik | 0.00404081 | 2.07175  |
| NM_008010          | Fgfr3         | 0.00733871 | 2.05909  |
| NM_001081249       | Vcan          | 0.00737183 | 2.05761  |
| NM_008843          | Pip           | 0.00236116 | 2.05661  |
| NM_011426          | Siglec1       | 0.00152960 | 2.05328  |
| NM_147221          | Glis1         | 0.00591795 | 2.05281  |
| BC015298           | Muc3          | 0.00828438 | 2.04785  |
| NM_145423          | Slc5a8        | 0.00319161 | 2.04343  |
| BC063072           | Kirrel3       | 0.00393942 | 2.03972  |
| NM_172838          | Slc16a12      | 0.00418000 | 2.03325  |
| NM_031194          | Slc22a8       | 0.00534368 | 2.03256  |
| AF060570           | Robo3         | 0.00858572 | 2.03125  |
| ENSMUST00000069943 | Gm14318       | 0.00186688 | 2.0231   |
| DQ664197           | Gm1110        | 0.00228504 | 2.01942  |
| NM_017470          | Dnalc4        | 0.00216599 | 2.01032  |
| NM_198024          | Ranbp3l       | 0.00723670 | 2.00363  |
| NM_080595          | Emid1         | 0.00582781 | 2.00147  |
| BC147482           | Gm962         | 0.00475880 | -2.00079 |
| NM_001009573       | Unc13d        | 0.00967918 | -2.00794 |
| NM_001122683       | Bdh1          | 0.00642240 | -2.00806 |
| NM_007788          | Csnk2a1       | 0.00228759 | -2.01009 |
| NM_013719          | Eif2ak4       | 0.00983537 | -2.0132  |
| NM_001048192       | Agbl5         | 0.00748912 | -2.01466 |
| NM_026493          | Cspp1         | 0.00747745 | -2.02244 |
| NM_021458          | Fzd3          | 0.00525767 | -2.02265 |
| NM_028331          | C1qtnf6       | 0.00569375 | -2.02419 |
| NM_023220          | 2010106G01Rik | 0.00040644 | -2.02442 |
| NM_030721          | Acox3         | 0.00042867 | -2.02507 |
| NM_007663          | Cdh16         | 0.00680799 | -2.02597 |
| NM_001102430       | Arfgef1       | 0.00193837 | -2.02964 |
| NM_145824          | Ranbp10       | 0.00570998 | -2.03384 |
| NM_001002764       | Smg6          | 0.00205591 | -2.03457 |
| NM_199057          | Rusc2         | 0.00398886 | -2.03474 |
| NM_010631          | Kifc3         | 0.00030726 | -2.04014 |
| NM_001142322       | Myo9b         | 0.00040617 | -2.04254 |
| NM_173788          | Npr2          | 0.00252266 | -2.04263 |
| ENSMUST00000039517 | Syde2         | 0.00375386 | -2.04485 |
| NM_011132          | Pole          | 0.00439420 | -2.04716 |
| NM_183268          | Defa20        | 0.00259697 | -2.04851 |
| NM_025836          | Plin3         | 0.00844479 | -2.04996 |
| NM_001104541       | Vmn2r92       | 0.00271309 | -2.05584 |
| NM_001042504       | Pitx2         | 0.00230582 | -2.05613 |
| NM_181588          | Cmb1          | 0.00671850 | -2.05628 |

|              |               |            |          |
|--------------|---------------|------------|----------|
| NM_010050    | Dio2          | 0.00039952 | -2.05777 |
| NM_010078    | Drp2          | 0.00127248 | -2.06098 |
| BC092140     | 4930579K19Rik | 0.00724359 | -2.06589 |
| NM_172261    | Ppp1r9b       | 0.00489612 | -2.06767 |
| NM_001145835 | Ralgds        | 0.00519080 | -2.07206 |
| NM_001128198 | Vps13d        | 0.00574268 | -2.07296 |
| NM_001037727 | Arhgap25      | 0.00840930 | -2.07646 |
| NM_001033280 | Gm94          | 0.00058790 | -2.07851 |
| NM_029606    | Ccdc46        | 0.00918451 | -2.07872 |
| NM_011138    | Pou2f2        | 0.00022005 | -2.07964 |
| NM_146183    | Zfp428        | 0.00952184 | -2.08346 |
| NM_008904    | Ppargc1a      | 0.00114803 | -2.08593 |
| NM_198093    | Elmo1         | 0.00344511 | -2.08709 |
| NM_153413    | Dock3         | 0.00773413 | -2.09158 |
| NM_001113549 | Ltbp4         | 0.00704823 | -2.09263 |
| NM_133984    | Hemk1         | 0.00318279 | -2.09284 |
| NM_172908    | Ovch2         | 0.00507797 | -2.09517 |
| NM_010889    | Neb           | 0.00383074 | -2.09559 |
| NM_009686    | Apbb2         | 0.00008107 | -2.09953 |
| NM_032394    | Myo7b         | 0.00438506 | -2.10082 |
| NM_177074    | Slc38a11      | 0.00659174 | -2.10319 |
| NM_053260    | Prss29        | 0.00794163 | -2.1035  |
| NM_139306    | Acer2         | 0.00755233 | -2.10426 |
| NM_026028    | Ccdc77        | 0.00767379 | -2.10468 |
| NM_033602    | Peli2         | 0.00678640 | -2.10469 |
| NM_027677    | Gpr39         | 0.00856357 | -2.10524 |
| NM_134005    | Enpp3         | 0.00754993 | -2.10579 |
| NM_178690    | Rab3gap1      | 0.00044172 | -2.10611 |
| NM_008608    | Mmp14         | 0.00697437 | -2.10668 |
| NM_028783    | Robo4         | 0.00808270 | -2.10672 |
| NM_009117    | Saa1          | 0.00414420 | -2.10905 |
| NM_001007580 | Fndc3c1       | 0.00538881 | -2.11274 |
| NM_011217    | Ptpr          | 0.00068862 | -2.11275 |
| NM_008606    | Mmp11         | 0.00831552 | -2.11326 |
| NM_008216    | Has2          | 0.00584900 | -2.11476 |
| NM_008305    | Hspg2         | 0.00738988 | -2.11741 |
| NM_001081426 | Dip2c         | 0.00161060 | -2.11758 |
| NM_021403    | 2900083I11Rik | 0.00559243 | -2.1179  |
| NM_172161    | Irak2         | 0.00060571 | -2.11944 |
| NM_175145    | Tmem127       | 0.00275480 | -2.12206 |
| AK173343     | Dnahc17       | 0.00224707 | -2.12243 |
| NM_007762    | Crhr1         | 0.00185079 | -2.12391 |
| NM_146221    | Zfp426        | 0.00502259 | -2.12522 |
| NM_153522    | Scn3b         | 0.00807700 | -2.12597 |
| NM_011123    | Plp1          | 0.00110120 | -2.1273  |
| NM_009355    | Tesp1         | 0.00295835 | -2.12924 |
| NM_173365    | Gpr20         | 0.00392135 | -2.13241 |
| NM_138750    | Prom2         | 0.00223289 | -2.13351 |
| NM_028193    | Brf1          | 0.00188325 | -2.1355  |

|              |               |            |          |
|--------------|---------------|------------|----------|
| NM_001004363 | Nuak1         | 0.00758476 | -2.13783 |
| NM_019922    | Crtap         | 0.00540199 | -2.138   |
| NM_001033336 | Abcc4         | 0.00865536 | -2.13824 |
| BC046516     | BC027072      | 0.00043945 | -2.13864 |
| NM_010746    | Ncr1          | 0.00319815 | -2.13865 |
| NM_011836    | Lamc3         | 0.00094425 | -2.13913 |
| NM_211138    | Pcyt1b        | 0.00375415 | -2.14295 |
| NM_173402    | Rgs12         | 0.00832667 | -2.14369 |
| NM_001162965 | Sgsm1         | 0.00669153 | -2.14439 |
| NM_145437    | Cd300ld       | 0.00898025 | -2.14577 |
| NM_173749    | Pamr1         | 0.00859188 | -2.14686 |
| NM_029838    | Col25a1       | 0.00514180 | -2.14742 |
| NM_026681    | Ccdc88c       | 0.00140655 | -2.15064 |
| NM_001128634 | Tppp2         | 0.00227277 | -2.1507  |
| NM_001081979 | Mecp2         | 0.00351233 | -2.15084 |
| BC027092     | Cep164        | 0.00696948 | -2.15132 |
| NM_016743    | Nell2         | 0.00350770 | -2.1584  |
| NM_009500    | Vav2          | 0.00799089 | -2.15841 |
| NM_011856    | Odz2          | 0.00092393 | -2.16001 |
| EU429481     | Igfn1         | 0.00602704 | -2.16227 |
| NM_146120    | Gsn           | 0.00187630 | -2.16324 |
| NM_007406    | Adcy7         | 0.00942564 | -2.16347 |
| NM_144815    | Cecr5         | 0.00759948 | -2.16446 |
| NM_178418    | Ccdc144b      | 0.00352677 | -2.16446 |
| NM_009523    | Wnt4          | 0.00088812 | -2.17299 |
| NM_008844    | Pip5k1c       | 0.00603675 | -2.17555 |
| NM_001085440 | Smcr8         | 0.00421621 | -2.17652 |
| NM_011286    | Rph3a         | 0.00279717 | -2.17791 |
| NM_008845    | Pip4k2a       | 0.00915426 | -2.17963 |
| BC009097     | 1110003E01Rik | 0.00829130 | -2.18258 |
| NM_001081688 | Tmprss9       | 0.00856877 | -2.18604 |
| NM_010569    | Invs          | 0.00619434 | -2.18635 |
| NM_001007572 | Trpv5         | 0.00590473 | -2.19014 |
| NM_007864    | Dlg4          | 0.00574809 | -2.19216 |
| NM_145129    | Chrna3        | 0.00670236 | -2.19499 |
| NM_053119    | Echs1         | 0.00036873 | -2.19976 |
| NM_022018    | Fam129a       | 0.00804810 | -2.20051 |
| NM_001109991 | Col18a1       | 0.00336842 | -2.20065 |
| XM_001473465 | Gm4988        | 0.00384443 | -2.20203 |
| NM_019439    | Gabbr1        | 0.00164479 | -2.20642 |
| NM_030235    | Avi9          | 0.00667325 | -2.20701 |
| NM_001003919 | Ddx11         | 0.00802512 | -2.20731 |
| BC070440     | Gm347         | 0.00477253 | -2.20937 |
| BC045525     | Susd3         | 0.00118186 | -2.20956 |
| NM_011324    | Scnn1a        | 0.00676140 | -2.21404 |
| NM_019757    | Fzr1          | 0.00174561 | -2.21581 |
| NM_001039554 | Angptl7       | 0.00759884 | -2.21681 |
| NM_001012765 | Adcy5         | 0.00054748 | -2.21739 |
| NM_172790    | Ankrd52       | 0.00845514 | -2.21811 |



|                    |               |            |          |
|--------------------|---------------|------------|----------|
| NM_178758          | Acsn5         | 0.00435969 | -2.21861 |
| BC013508           | 9130017N09Rik | 0.00077240 | -2.22316 |
| NM_027960          | Dpep3         | 0.00929406 | -2.22435 |
| NM_031260          | Mov10l1       | 0.00177905 | -2.22504 |
| NM_020263          | Cacna2d2      | 0.00169478 | -2.2276  |
| NM_018795          | Abcc6         | 0.00232449 | -2.22791 |
| NM_001102405       | Acp5          | 0.00154672 | -2.22917 |
| NM_001122818       | Pnpla6        | 0.00199204 | -2.2306  |
| NM_010229          | Flt3          | 0.00520882 | -2.23147 |
| NM_001085535       | Gm12581       | 0.00989800 | -2.23192 |
| NM_009014          | Rad51l1       | 0.00952753 | -2.23367 |
| BC030500           | BC030500      | 0.00447025 | -2.23812 |
| NM_010806          | Mllt4         | 0.00584414 | -2.24018 |
| NM_146025          | Samd14        | 0.00755407 | -2.24128 |
| NM_001037927       | Wdr93         | 0.00103974 | -2.24131 |
| NM_013841          | Vps45         | 0.00808011 | -2.24561 |
| NM_138657          | Socs7         | 0.00656637 | -2.24691 |
| NM_032393          | Mtap1a        | 0.00469277 | -2.24735 |
| BC087898           | Sirt5         | 0.00683798 | -2.24856 |
| NM_027008          | Kctd5         | 0.00847127 | -2.25661 |
| NM_177809          | AU042651      | 0.00478215 | -2.25997 |
| NM_173437          | Nav1          | 0.00107105 | -2.26435 |
| ENSMUST00000074388 | 9330101J02Rik | 0.00887632 | -2.26615 |
| NM_028005          | 2310047M10Rik | 0.00012804 | -2.26671 |
| NM_026658          | Mto1          | 0.00407248 | -2.26968 |
| NM_008398          | Itga7         | 0.00975381 | -2.27077 |
| NM_001001980       | Limch1        | 0.00805673 | -2.27204 |
| NM_013787          | Skp2          | 0.00016435 | -2.27216 |
| NM_010768          | Matk          | 0.00490075 | -2.2756  |
| NM_009477          | Upp1          | 0.00183478 | -2.27632 |
| NM_019497          | Grk4          | 0.00945119 | -2.27647 |
| NM_025416          | Them5         | 0.00286501 | -2.27708 |
| NM_007893          | E4f1          | 0.00955538 | -2.27813 |
| NM_182992          | Mypn          | 0.00323776 | -2.28261 |
| BC094937           | Rhoh          | 0.00906026 | -2.28715 |
| NM_001039176       | Elov1l        | 0.00988343 | -2.28923 |
| NM_025939          | Paics         | 0.00179052 | -2.29115 |
| NM_016805          | Hnrnpu        | 0.00175062 | -2.29483 |
| XR_032458          | Gm5131        | 0.00606783 | -2.29767 |
| NM_007424          | Acan          | 0.00273396 | -2.29901 |
| NM_001130150       | Arhgef1       | 0.00440734 | -2.29993 |
| NM_027180          | Arap1         | 0.00342030 | -2.30077 |
| NM_145941          | Eif4g1        | 0.00514218 | -2.30116 |
| NM_173765          | Aasdh         | 0.00820132 | -2.30469 |
| NM_017401          | Polm          | 0.00895546 | -2.30498 |
| NR_027852          | Cd40          | 0.00719341 | -2.30913 |
| NM_178086          | Fa2h          | 0.00269256 | -2.30959 |
| NM_009179          | St3gal2       | 0.00790657 | -2.313   |
| NM_027406          | Aldh1l1       | 0.00014422 | -2.31641 |

|                    |               |            |          |
|--------------------|---------------|------------|----------|
| NM_001004366       | Scube3        | 0.00898618 | -2.31692 |
| NM_152895          | Kdm5b         | 0.00381221 | -2.32581 |
| NM_053246          | Dok4          | 0.00668570 | -2.33027 |
| NM_025494          | Atp6v1c1      | 0.00080779 | -2.33038 |
| NM_010168          | F2            | 0.00071257 | -2.33152 |
| NM_018774          | Phc2          | 0.00790676 | -2.33159 |
| NM_030080          | Creb3l4       | 0.00195360 | -2.33413 |
| NM_010154          | Erbp4         | 0.00366870 | -2.33456 |
| NM_146257          | Slc29a4       | 0.00740955 | -2.33461 |
| NM_009499          | Vasp          | 0.00538518 | -2.33612 |
| NM_175546          | Wdfy2         | 0.00951194 | -2.33794 |
| BC034187           | BC035947      | 0.00301793 | -2.34043 |
| BC137977           | 1700006A11Rik | 0.00433695 | -2.34044 |
| NM_008958          | Ptch2         | 0.00246589 | -2.34119 |
| NM_010141          | Epha7         | 0.00659242 | -2.34157 |
| NM_134241          | V1rh18        | 0.00323198 | -2.34259 |
| NM_145076          | Trim24        | 0.00584878 | -2.34304 |
| NM_178804          | Slit2         | 0.00571949 | -2.34462 |
| NM_019424          | Hps1          | 0.00396798 | -2.34614 |
| NM_198598          | Rhox11        | 0.00164796 | -2.34648 |
| BC048569           | 4930538K18Rik | 0.00293351 | -2.34904 |
| NM_178795          | Hisppd2a      | 0.00099482 | -2.35191 |
| NM_013758          | Add3          | 0.00653157 | -2.35342 |
| NM_201354          | Gm672         | 0.00489788 | -2.35476 |
| AK075676           | Fbxw17        | 0.00657210 | -2.35813 |
| ENSMUST00000093911 | Myo15b        | 0.00363611 | -2.36163 |
| NM_172674          | Phf20         | 0.00542956 | -2.3653  |
| NM_009515          | Was           | 0.00342355 | -2.36616 |
| NM_017383          | Cntn6         | 0.00615150 | -2.36647 |
| NM_001122754       | Txk           | 0.00601400 | -2.3673  |
| BC119234           | 1810041L15Rik | 0.00729993 | -2.36824 |
| NM_016778          | Bok           | 0.00078130 | -2.37175 |
| NM_148927          | Plekha4       | 0.00563364 | -2.37219 |
| ENSMUST00000102530 | Sema3b        | 0.00945647 | -2.37729 |
| NM_008486          | Anpep         | 0.00084951 | -2.37913 |
| NM_025833          | Baiap2l1      | 0.00381028 | -2.38085 |
| BC009140           | Mfsd5         | 0.00499355 | -2.3826  |
| BC006583           | Ccdc136       | 0.00069308 | -2.38348 |
| NM_138604          | Otud5         | 0.00980135 | -2.38652 |
| NM_001081391       | Csmd3         | 0.00046822 | -2.38795 |
| NM_182930          | Plekha6       | 0.00936317 | -2.38881 |
| NM_001002267       | Tmem158       | 0.00819684 | -2.3889  |
| BC031748           | BC031748      | 0.00658111 | -2.39054 |
| NM_008607          | Mmp13         | 0.00758237 | -2.39223 |
| NM_013797          | Slco1a1       | 0.00296968 | -2.39334 |
| NM_001146046       | Lrrc49        | 0.00394648 | -2.39407 |
| NM_010010          | Cyp46a1       | 0.00228384 | -2.39481 |
| NM_001039126       | Asb1          | 0.00780836 | -2.39496 |
| NM_029793          | Golga1        | 0.00026829 | -2.39612 |

|                    |               |            |          |
|--------------------|---------------|------------|----------|
| NM_001081006       | Etl4          | 0.00022393 | -2.40216 |
| NM_001033537       | Pgap3         | 0.00051024 | -2.40309 |
| NM_009636          | Aebp1         | 0.00299183 | -2.40488 |
| BC137623           | Mmrn1         | 0.00360712 | -2.40505 |
| NM_001081130       | Ogdhl         | 0.00333807 | -2.40922 |
| NM_177066          | Tnni3k        | 0.00835420 | -2.41573 |
| NM_033541          | Oas1c         | 0.00762593 | -2.41721 |
| BC055808           | Cdh10         | 0.00192839 | -2.41762 |
| NM_001024617       | Inpp4b        | 0.00245770 | -2.41841 |
| NM_177829          | Spink10       | 0.00365145 | -2.42153 |
| AY702102           | AY702102      | 0.00381832 | -2.4239  |
| NM_029425          | 4833424O15Rik | 0.00755090 | -2.42412 |
| NM_016981          | Slc9a1        | 0.00078825 | -2.42852 |
| ENSMUST00000115200 | Nrf1          | 0.00744856 | -2.42975 |
| XM_915909          | Rgs21         | 0.00514147 | -2.4301  |
| NM_027293          | Dopey2        | 0.00794362 | -2.43159 |
| ENSMUST00000105969 | Epb4.1        | 0.00235576 | -2.4342  |
| NM_172571          | Fbf1          | 0.00587092 | -2.43566 |
| NM_144524          | Angel1        | 0.00248868 | -2.44313 |
| NM_001159558       | Cd36          | 0.00842752 | -2.44669 |
| NM_009618          | Adam2         | 0.00860689 | -2.45083 |
| NM_011197          | Ptgrn         | 0.00543604 | -2.45276 |
| NM_011131          | Pold1         | 0.00575222 | -2.45591 |
| NM_008425          | Kcnj2         | 0.00358170 | -2.45738 |
| NM_183289          | Tcerg1l       | 0.00606688 | -2.45975 |
| NM_001033270       | Slc4a7        | 0.00711529 | -2.46096 |
| NM_172506          | Boc           | 0.00065037 | -2.46809 |
| NM_145070          | Hip1r         | 0.00008560 | -2.46923 |
| NM_178406          | Gpr153        | 0.00701517 | -2.47041 |
| NM_019963          | Stat2         | 0.00526413 | -2.47318 |
| NM_008384          | Inpp1         | 0.00977383 | -2.47441 |
| NM_011837          | Ly6h          | 0.00997267 | -2.47748 |
| NM_146075          | Lemd2         | 0.00789383 | -2.48138 |
| NM_012046          | Spo11         | 0.00327969 | -2.48603 |
| NM_001122829       | Upf1          | 0.00617001 | -2.49138 |
| NM_146241          | Trhde         | 0.00255585 | -2.49413 |
| NM_033149          | B3galt5       | 0.00177274 | -2.49438 |
| AF380423           | Dleu2         | 0.00245688 | -2.49466 |
| NM_145362          | Alg1          | 0.00863047 | -2.49553 |
| NM_008884          | Pml           | 0.00729004 | -2.4961  |
| NM_175649          | Tnfrsf26      | 0.00629888 | -2.49684 |
| NM_016695          | Mpp2          | 0.00255007 | -2.49832 |
| NM_173755          | Ube2o         | 0.00464399 | -2.49879 |
| NM_153407          | Csrnp2        | 0.00609148 | -2.49932 |
| NM_198651          | 4430402I18Rik | 0.00074344 | -2.49962 |
| NM_028051          | Slc39a5       | 0.00246530 | -2.50161 |
| NM_197943          | Sgsm2         | 0.00850904 | -2.50264 |
| NM_009160          | Sftpd         | 0.00112002 | -2.50465 |
| NM_138674          | Pkhd1l1       | 0.00393312 | -2.50724 |

|                    |               |            |          |
|--------------------|---------------|------------|----------|
| NM_001042653       | Oip5          | 0.00800843 | -2.50823 |
| NM_001081341       | Scaper        | 0.00225196 | -2.50881 |
| NM_153127          | Mmnr2         | 0.00837823 | -2.51798 |
| NM_020519          | Slurp1        | 0.00188508 | -2.52017 |
| NM_028806          | Phactr3       | 0.00514083 | -2.52063 |
| ENSMUST00000095969 | Rbm20         | 0.00488435 | -2.52294 |
| NM_174850          | Micall2       | 0.00807010 | -2.52575 |
| NM_009509          | Vil1          | 0.00897717 | -2.52643 |
| NM_026298          | Ift172        | 0.00548128 | -2.52854 |
| NM_133757          | Pgs1          | 0.00625109 | -2.52894 |
| NM_026748          | Ints1         | 0.00330738 | -2.53089 |
| NM_027724          | Cage1         | 0.00665210 | -2.53224 |
| NM_001024926       | Cyb5d2        | 0.00392527 | -2.53349 |
| NM_172274          | Cc2d2a        | 0.00954830 | -2.53506 |
| NM_008222          | Hccs          | 0.00999211 | -2.53945 |
| NM_133251          | Vgll1         | 0.00156747 | -2.53998 |
| NM_026346          | Fbxo32        | 0.00645442 | -2.54146 |
| NM_172608          | Tmem184b      | 0.00542283 | -2.54223 |
| NR_027641          | Sec16b        | 0.00281481 | -2.54728 |
| NM_025469          | Clps          | 0.00531250 | -2.5517  |
| NM_013748          | Clnk          | 0.00286803 | -2.55182 |
| BC096371           | D18Ertd653e   | 0.00385523 | -2.55472 |
| NM_178621          | Phyhipl       | 0.00746990 | -2.55637 |
| NM_001081017       | Unc79         | 0.00508228 | -2.55834 |
| NM_146119          | Fam129b       | 0.00058704 | -2.5622  |
| NM_011597          | Tjp2          | 0.00437663 | -2.56349 |
| NM_028711          | Slc25a27      | 0.00097849 | -2.56469 |
| NM_025858          | Shisa5        | 0.00965972 | -2.56643 |
| NM_173397          | Fitm2         | 0.00857728 | -2.56981 |
| NM_028048          | Slc25a35      | 0.00541928 | -2.57036 |
| NM_033615          | Adam33        | 0.00590379 | -2.57071 |
| NM_011587          | Tie1          | 0.00613975 | -2.57127 |
| NM_178873          | Adck2         | 0.00866163 | -2.57232 |
| NM_011656          | Tuft1         | 0.00739608 | -2.57497 |
| BC132293           | 4632411B12Rik | 0.00761190 | -2.57616 |
| NM_144941          | Mtap7d1       | 0.00394763 | -2.58054 |
| BC023748           | 6330416G13Rik | 0.00041267 | -2.5932  |
| NM_001081050       | Pard3b        | 0.00245857 | -2.59371 |
| NM_009511          | Vipr2         | 0.00928805 | -2.59399 |
| NM_007713          | Clk3          | 0.00930079 | -2.5953  |
| NM_198656          | Cdh26         | 0.00348597 | -2.59717 |
| NM_031162          | Cd247         | 0.00982846 | -2.59724 |
| NM_009482          | Utf1          | 0.00279483 | -2.60376 |
| NM_009207          | Slc4a2        | 0.00808166 | -2.60458 |
| NM_001110162       | Cdca2         | 0.00261025 | -2.60718 |
| NM_029049          | Ptchd3        | 0.00564147 | -2.60828 |
| ENSMUST00000100889 | Gm10405       | 0.00064278 | -2.61417 |
| NM_023831          | 1500035H01Rik | 0.00996043 | -2.61609 |
| NM_027937          | Caskin1       | 0.00591007 | -2.61633 |

|                    |               |            |          |
|--------------------|---------------|------------|----------|
| NM_011281          | Rorc          | 0.00687023 | -2.61991 |
| NM_053196          | Sfxn2         | 0.00087763 | -2.62084 |
| NM_011962          | Plod3         | 0.00006565 | -2.6278  |
| NM_001081330       | Dnahc2        | 0.00726632 | -2.62917 |
| NM_146008          | Tcp11l2       | 0.00867883 | -2.63485 |
| NM_198022          | Tnrc6c        | 0.00818048 | -2.63594 |
| NM_001081171       | Lama5         | 0.00206515 | -2.6517  |
| NM_007963          | Mecom         | 0.00493126 | -2.65209 |
| NM_011303          | Dhrs3         | 0.00436805 | -2.65806 |
| NM_133715          | Arhgap27      | 0.00845479 | -2.66417 |
| NM_008454          | Klk1b16       | 0.00074743 | -2.66844 |
| NM_010260          | Gbp2          | 0.00075945 | -2.66977 |
| NM_021292          | Evc           | 0.00771354 | -2.67273 |
| NM_016902          | Nphp1         | 0.00169528 | -2.6786  |
| NM_147001          | Olfr172       | 0.00482801 | -2.67871 |
| NM_178685          | Pcdh20        | 0.00687000 | -2.68614 |
| NM_001098170       | Pcdh10        | 0.00582549 | -2.69399 |
| ENSMUST00000063256 | Pou6f2        | 0.00171689 | -2.69918 |
| NM_001142918       | Tcf7l2        | 0.00082698 | -2.70814 |
| NM_031998          | Tsga14        | 0.00615104 | -2.70835 |
| NM_153131          | Unc5a         | 0.00846700 | -2.7125  |
| NM_028889          | Efdh1         | 0.00434926 | -2.72035 |
| NM_029979          | Trim35        | 0.00348859 | -2.72192 |
| NM_145404          | Prmt7         | 0.00477281 | -2.72264 |
| NM_177318          | Zfp653        | 0.00582157 | -2.72554 |
| NM_001111111       | Atg16l2       | 0.00015308 | -2.72865 |
| NM_009900          | Clcn2         | 0.00269175 | -2.73153 |
| NM_009565          | Zbtb7b        | 0.00000327 | -2.7341  |
| NM_013565          | Itga3         | 0.00608015 | -2.73631 |
| NM_001111053       | Dclk1         | 0.00636687 | -2.73868 |
| NM_010547          | Ikbkg         | 0.00378687 | -2.73928 |
| NM_172840          | Vwa2          | 0.00028854 | -2.74259 |
| NM_177587          | Aqp12         | 0.00057329 | -2.74528 |
| NM_008599          | Cxcl9         | 0.00691252 | -2.74637 |
| NM_025590          | Acot11        | 0.00396639 | -2.74665 |
| NM_177573          | 9930104L06Rik | 0.00397592 | -2.74715 |
| NM_001079686       | Syne1         | 0.00449916 | -2.75112 |
| NM_146010          | Tspan8        | 0.00504106 | -2.7557  |
| NM_001045522       | BC030499      | 0.00035693 | -2.76263 |
| NM_027171          | 2310057J16Rik | 0.00015636 | -2.76289 |
| NM_145602          | Ndrp4         | 0.00491651 | -2.76499 |
| NM_001013756       | Grhl3         | 0.00796262 | -2.77401 |
| NM_001081028       | Sipa1l3       | 0.00929695 | -2.77557 |
| NM_133810          | Stk17b        | 0.00835556 | -2.77862 |
| NM_024282          | Pppde1        | 0.00946425 | -2.77961 |
| NM_213616          | Atp2b4        | 0.00202063 | -2.78011 |
| NM_011937          | Gnpda1        | 0.00042072 | -2.78029 |
| NM_024264          | Cyp27a1       | 0.00675963 | -2.787   |
| NM_133973          | Cog4          | 0.00907014 | -2.78773 |

|                    |               |            |          |
|--------------------|---------------|------------|----------|
| NM_023116          | Cacnb2        | 0.00645142 | -2.79125 |
| XM_909906          | I830127L07Rik | 0.00361320 | -2.7926  |
| NM_016899          | Rab25         | 0.00809975 | -2.7964  |
| NM_009474          | Uox           | 0.00875485 | -2.79905 |
| U77684             | Rxra          | 0.00570842 | -2.79964 |
| AK122464           | Plekhh1       | 0.00454144 | -2.80006 |
| NM_146016          | C230094A16Rik | 0.00930985 | -2.80082 |
| NM_001033350       | Bank1         | 0.00525567 | -2.80156 |
| NM_013472          | Anxa6         | 0.00086818 | -2.80559 |
| NM_172409          | Fmn12         | 0.00393214 | -2.80758 |
| NM_001025576       | 2610301F02Rik | 0.00236564 | -2.81505 |
| NM_145409          | Chtf18        | 0.00936607 | -2.81866 |
| NM_139300          | Mylk          | 0.00935322 | -2.82715 |
| NM_001081269       | Whsc111       | 0.00335803 | -2.8283  |
| AK086107           | Myof          | 0.00245081 | -2.83324 |
| NM_178869          | Ttl1          | 0.00463323 | -2.83749 |
| AK129029           | Gm10033       | 0.00503649 | -2.84188 |
| NM_177697          | Vwa3a         | 0.00318310 | -2.85214 |
| AF283559           | Rps2          | 0.00454170 | -2.85907 |
| NM_025660          | Ribc1         | 0.00799451 | -2.86306 |
| NM_172800          | Sdk2          | 0.00612606 | -2.86767 |
| NM_028119          | Ddb2          | 0.00751928 | -2.87195 |
| NM_001029936       | Cytsb         | 0.00978215 | -2.87599 |
| NM_027880          | Telo2         | 0.00037815 | -2.87888 |
| NM_019866          | Spib          | 0.00815097 | -2.88134 |
| NM_008739          | Nsd1          | 0.00061903 | -2.88409 |
| NM_175515          | Intu          | 0.00942515 | -2.88682 |
| NM_009369          | Tgfb1         | 0.00755021 | -2.89497 |
| NM_026327          | 1810048J11Rik | 0.00267260 | -2.89595 |
| NM_001013813       | Maml2         | 0.00716664 | -2.89817 |
| NM_178714          | Lrnf5         | 0.00312437 | -2.89828 |
| NM_023525          | Cad           | 0.00345901 | -2.90221 |
| ENSMUST00000062608 | Asxl3         | 0.00573874 | -2.90412 |
| NM_001033489       | Rnf207        | 0.00767359 | -2.9175  |
| NM_028710          | Arsg          | 0.00887100 | -2.92039 |
| NM_145990          | Cdk5rap2      | 0.00235683 | -2.9377  |
| NM_019535          | Sh3gl2        | 0.00927698 | -2.94047 |
| NM_025730          | Lrrk2         | 0.00919432 | -2.94854 |
| NM_177379          | Grit          | 0.00124548 | -2.94884 |
| NM_027442          | Ddo           | 0.00992781 | -2.95263 |
| NM_001081106       | Cytl1         | 0.00182480 | -2.95439 |
| NM_033398          | Jmjd6         | 0.00322485 | -2.96057 |
| NM_027238          | Ttc39b        | 0.00844565 | -2.96147 |
| NM_020574          | Kcne3         | 0.00853369 | -2.97152 |
| NM_009496          | Vamp1         | 0.00975941 | -2.9742  |
| NM_001083927       | Tle3          | 0.00520625 | -2.98516 |
| NM_010140          | Epha3         | 0.00184861 | -2.98789 |
| NM_029629          | Fahd2a        | 0.00188177 | -2.9892  |
| NM_021327          | Tnip1         | 0.00256307 | -2.99708 |

|                    |               |            |          |
|--------------------|---------------|------------|----------|
| ENSMUST00000037552 | Lepr          | 0.00439709 | -2.99929 |
| NM_017406          | Atf6b         | 0.00446685 | -2.99994 |
| NM_001081178       | Gpr116        | 0.00402309 | -3.00071 |
| BC117982           | Ccdc135       | 0.00644368 | -3.00235 |
| NM_172162          | Hinfp         | 0.00061968 | -3.0078  |
| NM_172053          | Adamts16      | 0.00074497 | -3.01871 |
| NM_011777          | Zyx           | 0.00782057 | -3.02309 |
| NM_020268          | Klk1b27       | 0.00069570 | -3.02533 |
| BC005433           | Map4k1        | 0.00372334 | -3.02544 |
| NM_011857          | Odz3          | 0.00134489 | -3.03074 |
| NM_172768          | Gramd1b       | 0.00652109 | -3.03538 |
| NM_009728          | Atp10a        | 0.00727374 | -3.0395  |
| NM_153177          | Eif2c4        | 0.00255800 | -3.0412  |
| NM_001001602       | Dab2ip        | 0.00918410 | -3.04461 |
| NM_013851          | Abca8b        | 0.00468715 | -3.0464  |
| NM_001040692       | Slc6a18       | 0.00434173 | -3.04972 |
| NM_013691          | Thbs3         | 0.00023290 | -3.05117 |
| NM_010553          | Il18rap       | 0.00505466 | -3.05598 |
| NM_133990          | Il13ra1       | 0.00636435 | -3.05709 |
| NM_018824          | Slc23a2       | 0.00943029 | -3.0612  |
| NM_145149          | Rasgrp4       | 0.00407235 | -3.06505 |
| NM_029738          | Cluap1        | 0.00196788 | -3.07186 |
| NM_001082414       | Sh3d19        | 0.00828389 | -3.09233 |
| NM_177059          | Fstl4         | 0.00984529 | -3.09406 |
| NM_021474          | Efemp2        | 0.00808385 | -3.09693 |
| NM_021718          | Ms4a4b        | 0.00782065 | -3.09983 |
| AK172973           | Erp44         | 0.00954135 | -3.1073  |
| NM_172668          | Lrp4          | 0.00608578 | -3.11442 |
| NM_007605          | Capza3        | 0.00017992 | -3.11782 |
| NM_008484          | Lamb3         | 0.00298090 | -3.12109 |
| BC138108           | B930007M17Rik | 0.00700471 | -3.12395 |
| NM_011741          | Zan           | 0.00949816 | -3.12396 |
| NM_181853          | Trim66        | 0.00154353 | -3.12789 |
| NM_199302          | Lrsam1        | 0.00385678 | -3.1286  |
| NM_025696          | Sorcs3        | 0.00107234 | -3.13218 |
| NM_001113517       | Arhgef7       | 0.00694178 | -3.13932 |
| NM_146091          | Atl3          | 0.00313475 | -3.13995 |
| NM_015764          | Greb1         | 0.00952129 | -3.14285 |
| NM_153062          | Slc37a1       | 0.00208217 | -3.14413 |
| NM_013806          | Abcc2         | 0.00267661 | -3.14713 |
| NM_010060          | Dnahc11       | 0.00344821 | -3.14905 |
| NM_153391          | Wdr19         | 0.00113275 | -3.15281 |
| XM_146277          | Gm501         | 0.00293069 | -3.15518 |
| NM_011246          | Rasgrp1       | 0.00626506 | -3.15867 |
| ENSMUST00000005357 | Plekha8       | 0.00006102 | -3.16107 |
| NM_175210          | Abca12        | 0.00915699 | -3.16533 |
| NM_019568          | Cxcl14        | 0.00594072 | -3.16655 |
| NM_008375          | Fabp6         | 0.00359809 | -3.17648 |
| NR_004843          | Chkb-cpt1b    | 0.00022277 | -3.1812  |

|                    |               |            |          |
|--------------------|---------------|------------|----------|
| NM_007758          | Cr2           | 0.00305520 | -3.18681 |
| NM_175539          | Dcaf12l2      | 0.00334557 | -3.19583 |
| NM_001024137       | Pla2g4d       | 0.00586926 | -3.19753 |
| NM_175276          | Fhod3         | 0.00045738 | -3.19791 |
| NM_010024          | Dct           | 0.00414983 | -3.20336 |
| NM_007407          | Adcyap1r1     | 0.00178867 | -3.21226 |
| NM_001017426       | Kdm6b         | 0.00351640 | -3.22354 |
| NM_023597          | Wdr31         | 0.00166126 | -3.23085 |
| NM_027777          | Pex1          | 0.00060681 | -3.23776 |
| NM_213729          | Inca1         | 0.00745408 | -3.23933 |
| NM_172476          | Tmc7          | 0.00619823 | -3.25108 |
| NM_001081039       | Dock9         | 0.00242320 | -3.25978 |
| NM_001001183       | Tmem204       | 0.00706559 | -3.26723 |
| NM_026067          | Eri1          | 0.00591486 | -3.26793 |
| NM_177773          | 4933408B17Rik | 0.00317175 | -3.2691  |
| NM_013557          | Eif2ak1       | 0.00104791 | -3.27283 |
| NM_008980          | Ptpa          | 0.00943109 | -3.28184 |
| NM_145619          | Parp3         | 0.00828059 | -3.28767 |
| NM_029017          | Mrpl47        | 0.00317883 | -3.29064 |
| NM_001013405       | D9Ert402e     | 0.00063603 | -3.2972  |
| NM_030210          | Aacs          | 0.00369838 | -3.30974 |
| NM_011521          | Sdc4          | 0.00403581 | -3.31375 |
| NM_139145          | Hlcs          | 0.00514591 | -3.31642 |
| BC115639           | 4930550C14Rik | 0.00739890 | -3.32467 |
| NM_172516          | Dstyk         | 0.00943212 | -3.36036 |
| NM_177857          | Dennd2c       | 0.00384785 | -3.36373 |
| L27105             | Nf2           | 0.00448178 | -3.37838 |
| NM_032543          | Rnf123        | 0.00824296 | -3.39181 |
| NM_021280          | Plcg1         | 0.00742805 | -3.40534 |
| NM_008788          | Pcolce        | 0.00891615 | -3.4084  |
| NM_008194          | Gyk           | 0.00434262 | -3.41755 |
| NM_178702          | Radil         | 0.00766649 | -3.41902 |
| NM_007564          | Zfp3611       | 0.00427352 | -3.41931 |
| AF090403           | Qk            | 0.00426496 | -3.43712 |
| NM_009660          | Alox15        | 0.00608445 | -3.4448  |
| NM_001005608       | Itgb4         | 0.00501849 | -3.44721 |
| NM_010362          | Gsto1         | 0.00924926 | -3.45334 |
| NM_008797          | Pcx           | 0.00991027 | -3.47101 |
| BC046771           | B230312A22Rik | 0.00094269 | -3.47837 |
| NM_018873          | RP23-157O10.7 | 0.00189248 | -3.47954 |
| NM_011670          | Uchl1         | 0.00167384 | -3.48765 |
| NM_183016          | Cdc42bpb      | 0.00647895 | -3.49224 |
| NM_001024705       | Prmp5         | 0.00849708 | -3.50691 |
| XM_890873          | Gm6661        | 0.00171510 | -3.51232 |
| NM_146173          | Tspan33       | 0.00962436 | -3.51682 |
| ENSMUST00000021468 | Nin           | 0.00893615 | -3.52216 |
| NM_177328          | Grm7          | 0.00630613 | -3.52356 |
| NM_010863          | Myo1b         | 0.00572868 | -3.52597 |
| NM_010923          | Nnat          | 0.00144026 | -3.53152 |



|                    |               |            |          |
|--------------------|---------------|------------|----------|
| NM_199447          | Rrp12         | 0.00299398 | -3.53436 |
| NM_009928          | Col15a1       | 0.00140910 | -3.56827 |
| NM_010597          | Kcnab1        | 0.00751223 | -3.58261 |
| NM_001035510       | Zcchc18       | 0.00537482 | -3.61179 |
| NM_178118          | Dixdc1        | 0.00621904 | -3.61439 |
| NM_009778          | C3            | 0.00305834 | -3.61641 |
| NM_008880          | Plscr2        | 0.00742158 | -3.62412 |
| NM_198664          | Tbc1d2        | 0.00335891 | -3.6288  |
| NM_011580          | Thbs1         | 0.00571970 | -3.6306  |
| NM_194342          | Unc84b        | 0.00329826 | -3.64633 |
| NM_148922          | Mdm1          | 0.00103004 | -3.65129 |
| NM_021322          | Wdr4          | 0.00280055 | -3.67828 |
| ENSMUST00000031817 | Herc5         | 0.00882962 | -3.68411 |
| NM_007403          | Adam8         | 0.00180511 | -3.69002 |
| NM_028288          | Cul4b         | 0.00042633 | -3.69557 |
| BC035522           | AU022252      | 0.00236608 | -3.69924 |
| NM_017378          | Pcdh12        | 0.00274990 | -3.70211 |
| NM_001102474       | Skint3        | 0.00750149 | -3.70375 |
| NM_015731          | Atp9a         | 0.00369257 | -3.72049 |
| NM_028306          | Hspa12b       | 0.00790899 | -3.72646 |
| NM_027156          | Ddx51         | 0.00034116 | -3.73497 |
| NM_134156          | Actn1         | 0.00974720 | -3.74154 |
| NM_145227          | Oas2          | 0.00285527 | -3.75017 |
| NM_001037928       | Gm11992       | 0.00413524 | -3.75753 |
| NM_027059          | 1700023A16Rik | 0.00177443 | -3.76301 |
| NM_172781          | Klhl4         | 0.00255457 | -3.76532 |
| NM_010700          | Ldlr          | 0.00295196 | -3.7876  |
| NM_001035228       | St3gal5       | 0.00378808 | -3.80926 |
| NM_001081175       | Itpkb         | 0.00365958 | -3.81839 |
| NM_198037          | Cachd1        | 0.00280164 | -3.822   |
| NM_001141932       | Rbms1         | 0.00849065 | -3.82604 |
| BC118613           | 1110038D17Rik | 0.00260440 | -3.82814 |
| NM_145382          | BC021381      | 0.00731682 | -3.83447 |
| NM_028200          | 1300018I17Rik | 0.00872753 | -3.8503  |
| NM_011058          | Pdgfra        | 0.00190602 | -3.86675 |
| NM_008817          | Peg3          | 0.00603374 | -3.86802 |
| NM_001037717       | Slc38a6       | 0.00970174 | -3.8781  |
| NM_007732          | Col17a1       | 0.00645528 | -3.9     |
| BC067204           | Sbf2          | 0.00116760 | -3.91053 |
| NM_009955          | Dpysl2        | 0.00377468 | -3.9125  |
| NM_145926          | Mgat4b        | 0.00578154 | -3.91943 |
| NM_144552          | Stxbp6        | 0.00852351 | -3.92152 |
| NM_008029          | Flt4          | 0.00799688 | -3.92584 |
| NM_007868          | Dmd           | 0.00720161 | -3.9371  |
| NM_011539          | Tbxas1        | 0.00924907 | -3.94553 |
| NM_021565          | Midn          | 0.00159868 | -3.94899 |
| NM_133191          | Eps8l2        | 0.00329788 | -3.95715 |
| BC048379           | Zfyve26       | 0.00039028 | -3.95882 |
| NM_144920          | Plekha5       | 0.00780212 | -3.96184 |

|                    |           |            |          |
|--------------------|-----------|------------|----------|
| NM_001003910       | BC030307  | 0.00382258 | -3.96458 |
| NM_133952          | Unc45a    | 0.00282518 | -3.9801  |
| NM_176922          | Itga11    | 0.00109997 | -3.98049 |
| BC130272           | Fam65c    | 0.00767813 | -3.98363 |
| NM_207228          | Tsga10    | 0.00850337 | -3.99078 |
| NM_007854          | Slc29a2   | 0.00615853 | -4.00152 |
| NM_001024624       | Cdkl5     | 0.00710521 | -4.01016 |
| NM_015728          | Slc33a1   | 0.00325225 | -4.02188 |
| NM_029270          | Arhgap24  | 0.00221007 | -4.05955 |
| NM_008812          | Padi2     | 0.00321056 | -4.06458 |
| NM_178710          | Sik2      | 0.00246106 | -4.06903 |
| NM_030113          | Arhgap10  | 0.00998780 | -4.08929 |
| NM_007499          | Atm       | 0.00039186 | -4.0965  |
| NM_001099631       | Sh2d5     | 0.00402812 | -4.1017  |
| DQ867033           | Agbl1     | 0.00863916 | -4.12875 |
| NM_008664          | Myom2     | 0.00199553 | -4.12964 |
| NM_001081191       | Eml5      | 0.00063447 | -4.14088 |
| NM_025508          | Gmpr      | 0.00423954 | -4.14562 |
| NM_010593          | Jup       | 0.00998343 | -4.15077 |
| NM_001160400       | Meqf8     | 0.00433995 | -4.16347 |
| NM_011565          | Tead2     | 0.00752636 | -4.1761  |
| NM_009301          | Svs5      | 0.00103986 | -4.2294  |
| NM_001081215       | Ddx60     | 0.00328081 | -4.24165 |
| NM_031174          | Dscam     | 0.00592739 | -4.25592 |
| NM_021287          | Spnb3     | 0.00051986 | -4.26762 |
| XR_033411          | LOC676461 | 0.00701664 | -4.28105 |
| NM_007945          | Eps8      | 0.00706926 | -4.31157 |
| ENSMUST00000055297 | Pkd1l1    | 0.00194018 | -4.32718 |
| NM_146191          | Lrrk1     | 0.00653252 | -4.328   |
| NM_008781          | Pax3      | 0.00337147 | -4.35188 |
| NM_133238          | Cd209a    | 0.00649298 | -4.36708 |
| AK017896           | C2cd2     | 0.00174832 | -4.38548 |
| NM_053178          | Acsbg1    | 0.00446389 | -4.39763 |
| ENSMUST00000062286 | Rnf180    | 0.00228433 | -4.41724 |
| NM_013709          | Sh3yl1    | 0.00569129 | -4.44426 |
| NM_001081064       | Pdzd2     | 0.00135404 | -4.46115 |
| NM_011403          | Slc4a1    | 0.00134908 | -4.46196 |
| NM_009743          | Bcl2l1    | 0.00660098 | -4.47278 |
| NM_007905          | Phc1      | 0.00060126 | -4.48616 |
| ENSMUST00000095456 | Mcf2l     | 0.00593750 | -4.49588 |
| NM_018814          | Pcnx      | 0.00395074 | -4.52462 |
| NM_008712          | Nos1      | 0.00841795 | -4.55434 |
| NM_017398          | Diap2     | 0.00645178 | -4.57996 |
| NM_001085390       | Dusp5     | 0.00056926 | -4.62499 |
| NM_019709          | Mbtps1    | 0.00054868 | -4.65433 |
| NM_008644          | Prol1     | 0.00757386 | -4.65513 |
| NM_207682          | Kif1b     | 0.00800723 | -4.75988 |
| NM_021301          | Slc15a2   | 0.00241574 | -4.76146 |
| NM_001081358       | Lrrc7     | 0.00887490 | -4.76418 |

|                    |               |            |          |
|--------------------|---------------|------------|----------|
| NM_028150          | Supt7l        | 0.00233710 | -4.77764 |
| NM_001081335       | Cul9          | 0.00369938 | -4.78732 |
| NM_007856          | Dhcr7         | 0.00900455 | -4.81813 |
| ENSMUST00000027295 | Sema4c        | 0.00133498 | -4.81881 |
| AF313800           | Bcas3         | 0.00256830 | -4.84981 |
| NM_028228          | 2610028A01Rik | 0.00051701 | -4.89868 |
| NM_133992          | Usp52         | 0.00960366 | -4.92152 |
| ENSMUST00000063007 | Fam161a       | 0.00862806 | -4.93889 |
| NM_001029873       | Unc13a        | 0.00334960 | -4.94873 |
| NM_001039700       | Pkd1l3        | 0.00709108 | -4.95497 |
| NM_007976          | F5            | 0.00168525 | -4.95526 |
| NM_144868          | Pcnxl3        | 0.00851399 | -4.9631  |
| NM_010570          | Irs1          | 0.00779640 | -4.99329 |
| NM_177461          | Micall1       | 0.00883058 | -5.01434 |
| NM_001033293       | Uap1l1        | 0.00157263 | -5.02489 |
| NM_026922          | Atp2c2        | 0.00760495 | -5.04726 |
| NM_019434          | Mcm3ap        | 0.00603521 | -5.07929 |
| NM_007957          | Esx1          | 0.00699400 | -5.1733  |
| NM_007717          | Cmah          | 0.00863282 | -5.17421 |
| NM_178397          | Faf2          | 0.00578749 | -5.1993  |
| NM_178666          | Themis        | 0.00037953 | -5.21771 |
| NM_001040403       | Flot2         | 0.00816085 | -5.22281 |
| NM_028188          | Rusc1         | 0.00934733 | -5.22577 |
| AB183189           | Tcra          | 0.00753090 | -5.22703 |
| NM_145933          | St6gal1       | 0.00190794 | -5.24405 |
| NM_013887          | Opn4          | 0.00236086 | -5.24625 |
| ENSMUST00000050372 | Crb2          | 0.00859872 | -5.27745 |
| NM_008230          | Hdc           | 0.00633701 | -5.28866 |
| NM_007740          | Col9a1        | 0.00093199 | -5.3042  |
| NM_153546          | Mboat1        | 0.00682103 | -5.33522 |
| NM_053139          | Pcdhb14       | 0.00444107 | -5.3433  |
| NM_028152          | Mms19         | 0.00137663 | -5.34432 |
| ENSMUST00000094950 | Pgap1         | 0.00653225 | -5.35333 |
| NM_008934          | Proc          | 0.00741061 | -5.46382 |
| NM_025921          | 2610002M06Rik | 0.00343869 | -5.50868 |
| NM_011204          | Ptpn13        | 0.00961227 | -5.51323 |
| NM_012045          | Pla2g2f       | 0.00739814 | -5.52077 |
| NM_016693          | Map3k6        | 0.00266507 | -5.53801 |
| AF167554           | Tnfrsf19      | 0.00029993 | -5.547   |
| NM_007988          | Fasn          | 0.00142083 | -5.56415 |
| NM_008085          | Gapdhs        | 0.00945046 | -5.59717 |
| NM_026925          | Pnlip         | 0.00219114 | -5.64641 |
| ENSMUST00000091364 | 1700008P02Rik | 0.00234215 | -5.72934 |
| NM_031870          | Msh4          | 0.00958287 | -5.75156 |
| BC095961           | Homer3        | 0.00941117 | -5.78512 |
| NM_008238          | Foxn1         | 0.00653992 | -5.80277 |
| NM_181594          | Edc4          | 0.00112489 | -5.82667 |
| NM_032610          | Spnb4         | 0.00116127 | -5.84217 |
| NM_172808          | Antxrl        | 0.00158892 | -5.92416 |

|                    |                                       |            |          |
|--------------------|---------------------------------------|------------|----------|
| NM_001113353       | Synj2                                 | 0.00096424 | -6.00968 |
| NM_134080          | Flnb                                  | 0.00832431 | -6.0168  |
| NM_009782          | Cacna1e                               | 0.00137174 | -6.04168 |
| NM_010748          | Lyst                                  | 0.00799037 | -6.0434  |
| NM_013783          | Mme11                                 | 0.00189938 | -6.10835 |
| NM_010304          | Gna15                                 | 0.00833391 | -6.13839 |
| NM_172133          | Adap2                                 | 0.00890519 | -6.24384 |
| NM_029851          | Dync2h1                               | 0.00275758 | -6.2612  |
| NM_007769          | Dmbt1                                 | 0.00815935 | -6.30318 |
| NM_009012          | Rad50                                 | 0.00444159 | -6.38626 |
| NM_177056          | Tmem198                               | 0.00329305 | -6.38817 |
| NM_018793          | Tyk2                                  | 0.00741924 | -6.73143 |
| NM_010722          | Lmnb2                                 | 0.00068032 | -6.82965 |
| NM_030679          | Myh1                                  | 0.00208152 | -6.85737 |
| NM_019923          | Itpr2                                 | 0.00861122 | -6.87742 |
| NM_007378          | Abca4                                 | 0.00759466 | -6.96618 |
| NM_009904          | Clgn                                  | 0.00999306 | -6.97711 |
| NM_001159521       | Plxnb2                                | 0.00061084 | -6.99003 |
| NM_134000          | Traf3ip2                              | 0.00526870 | -7.05325 |
| NM_001033301       | Fhdc1                                 | 0.00961412 | -7.11526 |
| NM_207239          | Gtf3c1                                | 0.00822070 | -7.28746 |
| NM_001076554       | Spna2                                 | 0.00033862 | -7.30996 |
| NM_019472          | Myo10                                 | 0.00440925 | -7.43811 |
| NM_011652          | Ttn                                   | 0.00145345 | -7.43888 |
| NM_001081182       | Atp8b2                                | 0.00475596 | -7.82498 |
| NM_019689          | Arid3b                                | 0.00853387 | -7.82806 |
| NM_001081302       | Trio                                  | 0.00045748 | -7.98878 |
| ENSMUST00000112149 | Frmpd4                                | 0.00615020 | -8.00709 |
| NM_176987          | 4732471D19Rik                         | 0.00130124 | -8.20251 |
| NM_016850          | Irf7                                  | 0.00334571 | -8.23036 |
| NM_001145830       | Plcb1                                 | 0.00548519 | -8.83075 |
| NM_133979          | Ano10                                 | 0.00771030 | -8.83468 |
| NM_172601          | Rab2b                                 | 0.00010500 | -8.98287 |
| NM_001159507       | Grip2                                 | 0.00322455 | -9.04836 |
| NM_013727          | Azi2                                  | 0.00137839 | -9.07207 |
| XM_917532          | Gm7298                                | 0.00072706 | -9.07352 |
| NM_021022          | Abcb11                                | 0.00448732 | -9.61403 |
| NM_029870          | A930001N09Rik                         | 0.00380747 | -9.72689 |
| NM_023045          | Xpo7                                  | 0.00089546 | -10.6001 |
| NM_010587          | Itsn1                                 | 0.00555199 | -11.1553 |
| NM_001039472       | Kif21b                                | 0.00039547 | -12.7775 |
| NM_010233          | <td>0.00489278</td> <td>-12.8508</td> | 0.00489278 | -12.8508 |
| NM_001099635       | Myh3                                  | 0.00161664 | -13.1    |
| NM_134137          | Lars                                  | 0.00960611 | -14.084  |
| NM_011436          | Sorl1                                 | 0.00628512 | -14.8725 |

Public ID and gene symbols of differentially expressed (> 2-fold, p<0.01) genes are shown. In cases multiple probes correspond to the same gene, the result from probe that showed least p value without discrepancy in the up- or down-regulation is shown.

**Table S5. The 10 most significant pathways in KLS cells**

| No. | Name of pathway                                                                          | P value     |
|-----|------------------------------------------------------------------------------------------|-------------|
| 1   | Signal transduction_Calcium signaling                                                    | 0.000025330 |
| 2   | Immune response_NF-AT signaling and leukocyte interactions                               | 0.000267773 |
| 3   | Development_Angiotensin signaling via STATs                                              | 0.000374560 |
| 4   | Immune response_CD16 signaling in NK cells                                               | 0.000404481 |
| 5   | Apoptosis and survival_HTR1A signaling                                                   | 0.000425576 |
| 6   | Development_A2B receptor: action via G-protein alpha s                                   | 0.000425576 |
| 7   | Regulation of lipid metabolism_Regulation of fatty acid synthase activity in hepatocytes | 0.000455882 |
| 8   | DNA damage_DNA-damage-induced responses                                                  | 0.000587154 |
| 9   | Regulation of lipid metabolism_Regulation of lipid metabolism via LXR, NF-Y and SREBP    | 0.000848396 |
| 10  | Development_Role of IL-8 in angiogenesis                                                 | 0.000951584 |

Gene ontology analysis using MetaCore software determined significant pathways in differentially expressed genes in KLS cells shown in Supplemental Table 3. The 10 most significant pathways in this analysis among 650 signaling pathways in MetaCore database are shown.

**Table S6. The 10 most significant pathways in MEP cells**

| No. | Name of pathway                                                | P value     |
|-----|----------------------------------------------------------------|-------------|
| 1   | Cytoskeleton remodeling_Cytoskeleton remodeling                | 0.000000027 |
| 2   | Cell adhesion_Integrin-mediated cell adhesion and migration    | 0.000007231 |
| 3   | Immune response_Alternative complement pathway                 | 0.000011750 |
| 4   | Cytoskeleton remodeling_TGF, WNT and cytoskeletal remodeling   | 0.000016142 |
| 5   | Cell adhesion_Chemokines and adhesion                          | 0.000026833 |
| 6   | Immune response_Lectin induced complement pathway              | 0.000067214 |
| 7   | Cytoskeleton remodeling_Integrin outside-in signaling          | 0.000067214 |
| 8   | Immune response_Classical complement pathway                   | 0.000104131 |
| 9   | Muscle contraction_ACM regulation of smooth muscle contraction | 0.001033465 |
| 10  | Cell adhesion_Ephrin signaling                                 | 0.001682536 |

The MetaCore software determined significant pathways in differentially expressed genes in MEP cells shown in Supplemental Table 4. The 10 most significant pathways in this analysis among 650 signaling pathways in MetaCore database are shown.

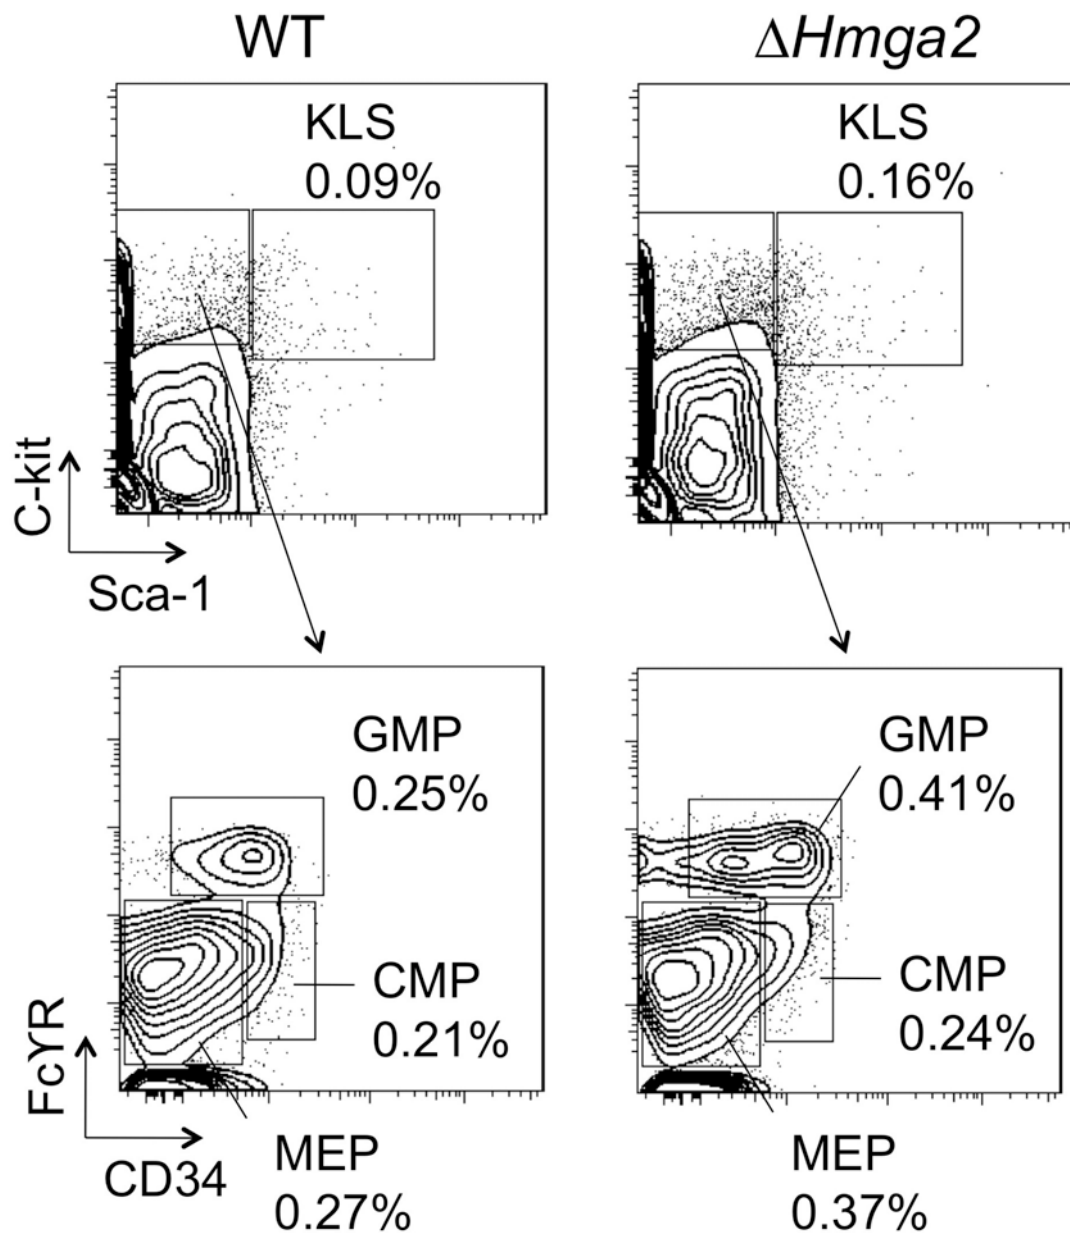

**Figure S1. Flow cytometry of HSC-enriched KLS cells and committed progenitor cells in BM.** In a gate of lineage<sup>-</sup> cells, c-kit<sup>+</sup>sca-1<sup>+</sup> HSC-enriched cells (KLS cells) and c-kit<sup>+</sup>sca-1<sup>-</sup> progenitor cells were gated (upper plots). In a c-kit<sup>+</sup>sca-1<sup>-</sup> cell fraction, common myeloid progenitor (CMP), granulocyte-monocyte progenitor (GMP), and megakaryocyte-erythrocyte progenitor (MEP) cells were separated (lower plots). KLS cells and MEP cells were sorted and used for the cDNA microarray analysis. Shown percentages are proportions of indicated cells in total BM cells.

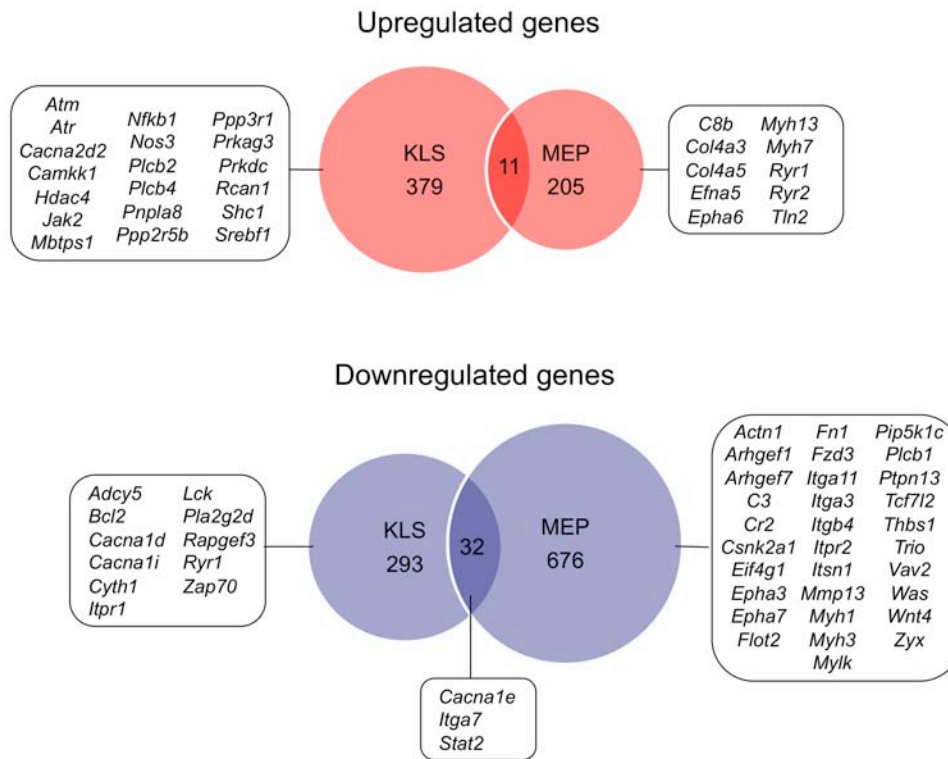

**Figure S2. Differentially expressed (>2 fold,  $p < 0.01$ ) genes in KLS cells and MEP cells from  $\Delta Hmga2$  mice compared to WT mice in microarray analysis.** Numbers of differentially expressed genes are shown in Venn diagrams. Symbols of differentially expressed genes involving in the 10 most significant pathways in KLS cells and MEP cells, which were determined by gene ontology analysis using the MetaCore software (GeneGo), are also shown.
